# Supplementary material
Source: PubMed Central journal article supplement (PMC5250571)
Supplement: NIHMS832508-supplement-Supp_Table_S1-S3.pdf [file NIHMS832508-supplement-Supp_Table_S1-S3.pdf]

## Dual specificity phosphatase 15 regulates Erk activation in Schwann cells

José F. Rodríguez-Molina<sup>1</sup>, Camila Lopez-Anido<sup>2,3</sup>, Ki H. Ma<sup>1</sup>, Chong Yu Zhang<sup>3</sup>, Tyler Olson<sup>3</sup>, Katharina N. Muth<sup>5</sup>, Matthias Weider<sup>5</sup>, John Svaren<sup>3,4,6</sup>

<sup>1</sup>Cellular and Molecular Pathology Graduate Program, <sup>2</sup>Comparative Biomedical Sciences Graduate Program, <sup>3</sup>Waisman Center, <sup>4</sup>Department of Comparative Biosciences, University of Wisconsin-Madison, Madison, WI 53705, USA <sup>5</sup>Institut für Biochemie, Emil-Fischer-Zentrum, Friedrich-Alexander-Universität Erlangen-Nürnberg, Erlangen, Germany,

<sup>6</sup>Corresponding Author: 1500 Highland Ave., Waisman Center, Madison, WI, USA 53705 (E-mail: [jpsvaren@wisc.edu](mailto:jpsvaren@wisc.edu))

Supplementary Table 1. Gene targets that contain either Egr2 or Myrf near the TSS versus those that contain both Egr2 and Myrf nearby.

| <u>Egr2-specific</u> | <u>Myrf-specific</u> | <u>Both<br/>Egr2/Myrf</u> | <u>Egr2-specific</u> | <u>Myrf-specific</u> | <u>Both<br/>Egr2/Myrf</u> |
|----------------------|----------------------|---------------------------|----------------------|----------------------|---------------------------|
| Zufsp                | Zrsr1                | Zfyve21                   | Zfp608               | Usp31                | Tyro3                     |
| Zswim7               | Zfp7                 | Zfpm1                     | Zfp574               | Usp2                 | Trdmt1                    |
| Zswim4               | Zfp57                | Zfp956                    | Zfp518a              | Urm1                 | Traf3ip2                  |
| Zswim2               | Zdhhc9               | Zfp706                    | Zfp503               | Unc5a                | Tpcn1                     |
| Zscan21              | Zdhhc20              | Zfp532                    | Zfp458               | Ugt1a1               | Tor1aip1                  |
| Zp4                  | Zdhhc14              | Zfp516                    | Zfp451               | Ufm1                 | Tob2                      |
| Zp3r                 | Zcchc2               | Zfp385b                   | Zfp444               | Ucp3                 | Tnrc18                    |
| Zp3                  | Zbtb43               | Zfp213                    | Zfp395               | Ubxn6                | Tnp1                      |
| Znr1                 | Zbtb38               | Zer1                      | Zfp36l2              | Ubn1                 | Tnfrsf11b                 |
| Zmynd11              | Zbtb3                | Zcchc24                   | Zfp36l1              | Ubiad1               | Tmem189                   |
| Zmiz1                | Ywhaq                | Ypel2                     | Zfp362               | Ube2v1               | Tmed10                    |
| Zkscan5              | Ypel5                | Ybx3                      | Zfp346               | Ube2e2               | Tmcc3                     |
| Zfyve28              | Wscd1                | Xkr5                      | Zfp330               | Ubash3b              | Tmc7                      |
| Zfx                  | Wnt7b                | Wrb                       | Zfp322a              | Ubac1                | Tll1                      |
| Zfp90                | Wipi1                | Wfikkn1                   | Zfp287               | Tysnd1               | Tk2                       |
| Zfp868               | Wipf1                | Wdr72                     | Zfp281               | Twsg1                | Tjap1                     |
| Zfp710               | Wfs1                 | Wdr5                      | Zfp217               | Tvp23a               | Timm9                     |
| Zfp709               | Wdr26                | Vps9d1                    | Zfp191               | Tusc5                | Thra                      |
| Zfp707               | Wdr20                | Vps37b                    | Zfp180               | Tulp4                | Tfap4                     |
| Zfp703               | Vps54                | Vamp3                     | Zfp157               | Ttf2                 | Tbx3                      |
| Zfp692               | Vldlr                | Uqcr10                    | Zfp148               | Tspan2               | T                         |
| Zfp655               | Vasp                 | Upb1                      | Zfand2a              | Tsc22d1              | Syt11                     |
| Zfp653               | Vangl1               | Unc5b                     | Zeb2                 | Trpc6                | Synrg                     |
| Zfp64                | Uts2                 | Ugt8                      | Zeb1                 | Trim47               | Syncrip                   |
| Zfp61                | Utf1                 | Ubtf                      | Zdhhc7               | Trim46               | Stx8                      |
| Zfp609               | Usp54                | Ubl3                      | Zdhhc3               | Trim45               | Stk17b                    |

| <u>Egr2-specific</u> | <u>Myrf-specific</u> | <u>Both</u><br><u>Egr2/Myrf</u> | <u>Egr2-specific</u> | <u>Myrf-specific</u> | <u>Both</u><br><u>Egr2/Myrf</u> |
|----------------------|----------------------|---------------------------------|----------------------|----------------------|---------------------------------|
| Zdhhc23              | Trim43a              | Stat1                           | Wdfy2                | Sulf2                | Rab5b                           |
| Zdhhc2               | Trim2                | Stard13                         | Wbscr17              | Sucnr1               | Qrfp                            |
| Zdhhc19              | Trib2                | St6gal1                         | Wbscr16              | Stxbp5               | Ptprf                           |
| Zcchc8               | Trhr2                | St3gal3                         | Wbp4                 | Stx4                 | Ptpn11                          |
| Zc3h15               | Trappc5              | Sstr5                           | Vwa1                 | Stmn4                | Ptma                            |
| Zc3h14               | Trappc3              | Ss18                            | Vta1                 | Stk40                | Psmf1                           |
| Zc3h11a              | Trappc10             | Spred2                          | Vstm4                | Stk4                 | Psmd1                           |
| Zc2hc1c              | Tra2a                | Sppl2b                          | Vps4b                | Stk35                | Psmb4                           |
| Zbtb37               | Tpsg1                | Sparc                           | Vps4a                | Stat5b               | Proser1                         |
| Zbed3                | Tpsb2                | Sox10                           | Vps39                | St8sia3              | Prkcd                           |
| Yy1                  | Tprn                 | Socs3                           | Vps18                | St3gal5              | Prdm1                           |
| Ywhah                | Tpra1                | Snx30                           | Vps13b               | St3gal4              | Ppif                            |
| Ywhag                | Tppp                 | Snapc5                          | Vps11                | Sstr3                | Pom121l2                        |
| Ywhae                | Tpd52                | Smurf1                          | Vom2r65              | Sspo                 | Plekha7                         |
| Ythdf3               | Tp53inp2             | Smox                            | Vom2r56              | Srpk1                | Pla2g3                          |
| Ythdf2               | Tox3                 | Smad7                           | Vom2r40              | Srgap1               | Pipox                           |
| Yme1l1               | Tns3                 | Slc6a6                          | Vom2r37              | Srcin1               | Pink1                           |
| Yipf5                | Tmub2                | Slc35g3                         | Vom2r12              | Spt1                 | Pim3                            |
| Yipf2                | Tmprss5              | Slain1                          | Vom1r28              | Spsb1                | Pik3r5                          |
| Yif1a                | Tmem98               | Sim2                            | Vom1r108             | Spopl                | Pik3r1                          |
| Yae1d1               | Tmem88b              | Sgms1                           | Vmp1                 | Spi1                 | Pik3c2b                         |
| Xylt2                | Tmem209              | Sept3                           | Vim                  | Spata24              | Pigz                            |
| Xpr1                 | Tmem200c             | Sec11c                          | Vgll4                | Sp9                  | Phf21b                          |
| Xpo1                 | Tmem178a             | Scrn1                           | Vgf                  | Sox5                 | Phf12                           |
| Xkr8                 | Tmem135              | Scarb1                          | Vdac2                | Snx33                | Pemt                            |
| Xbp1                 | Tmbim1               | Samd4a                          | Vdac1                | Snx1                 | Pea15                           |
| Wwtr1                | Tll2                 | S100a10                         | Vars2                | Snrpd1               | Pdgfrl                          |
| Wwp2                 | Thrb                 | Rufy1                           | Vapa                 | Snph                 | Pcif1                           |
| Wwox                 | Thap7                | Rttm                            | Vamp7                | Snd1                 | Pcbp3                           |
| Wt1                  | Tgfbr3               | Rtkn                            | Vamp4                | Snai1                | Patz1                           |
| Wsb2                 | Tfeb                 | Rpia                            | Vamp1                | Smyd3                | Paqr8                           |
| Wsb1                 | Tfcp2                | Rock2                           | Utp3                 | Smpd4                | P2rx4                           |
| Wnt9a                | Tf                   | Rnf217                          | Utp18                | Smndc1               | Optn                            |
| Wnt6                 | Tex261               | Rnf19b                          | Ust                  | Smek2                | Olr1638                         |
| Wisp3                | Tenm4                | Rnf144b                         | Uspl1                | Smc5                 | Olfml2b                         |
| Wisp1                | Tcp11                | Rimbp2                          | Usp48                | Smad5                | Ogdhl                           |
| Wipi2                | Tcf7l2               | Rhog                            | Usp46                | Slc9a1               | Nrp1                            |
| Wipf2                | Tbcb                 | Rhbdl3                          | Usp42                | Slc8a3               | Nipal4                          |
| Wfdc18               | Tbc1d10b             | RGD1310352                      | Usp36                | Slc7a9               | Ninj1                           |
| Wdr78                | Taf10                | RGD1309079                      | Usp30                | Slc6a9               | Ngly1                           |
| Wdr75                | Tab2                 | RGD1306739                      | Usp28                | Slc5a11              | Ngdn                            |
| Wdr60                | Syt13                | Rexo2                           | Usp25                | Slc48a1              | Nfix                            |
| Wdr53                | Syne3                | Rasgef1c                        | Usp22                | Slc45a3              | Nfic                            |
| Wdr35l               | Syndig1l             | Rai1                            | Usp15                | Slc43a1              | Nfasc                           |
| Wdfy3                | Syk                  | Rad51c                          | Usp12                | Slc35e4              | Neto2                           |

| <u>Egr2-specific</u> | <u>Myrf-specific</u> | <u>Both</u><br><u>Egr2/Myrf</u> | <u>Egr2-specific</u> | <u>Myrf-specific</u> | <u>Both</u><br><u>Egr2/Myrf</u> |
|----------------------|----------------------|---------------------------------|----------------------|----------------------|---------------------------------|
| Usp10                | Slc35c1              | Nek9                            | Tuba1a               | Ring1                | Klhl31                          |
| Uso1                 | Slc2a1               | Ndfip2                          | Ttyh1                | Rin3                 | Klhl20                          |
| Usf1                 | Slc25a5              | Ncor2                           | Tti2                 | Rhob                 | Klf9                            |
| Uqcrq                | Slc25a28             | Ncl                             | Ttc5                 | Rhcg                 | Klf7                            |
| Uqcrfs1              | Slc25a15             | Ncf1                            | Ttc29                | Rhbdl2               | Klf4                            |
| Uqcc2                | Slc24a2              | Nacc1                           | Ttc26                | Rhbdf1               | Kifc3                           |
| Ung                  | Slc22a3              | Myo18a                          | Ttc12                | Rgs2                 | Kdm3a                           |
| Unc50                | Slc22a23             | Musk                            | Tssk6                | Rgr                  | Kcnip1                          |
| Unc119b              | Slc16a6              | Mtus1                           | Tspyl4               | Rgma                 | Kcna1                           |
| Ulk1                 | Slc13a3              | Mrps27                          | Tspan4               | RGD1565641           | Kbtbd11                         |
| Ugp2                 | Slc10a7              | Mrpl19                          | Tspan18              | RGD1565498           | Itgb6                           |
| Ugdh                 | Sla                  | Mprip                           | Tspan17              | RGD1563441           | Irf2bpl                         |
| Ucn3                 | Sik3                 | Morf4l2                         | Tsku                 | RGD1563072           | Iqcg                            |
| Uchl3                | Sik1                 | Mob3b                           | Tsga10               | RGD1562114           | Il1a                            |
| Ubxn11               | Siah2                | Mob1b                           | Tsc22d3              | RGD1562079           | Igsf11                          |
| Ubqln1               | Shmt1                | Mmp17                           | Trpv4                | RGD1561870           | Ict1                            |
| Ublcp1               | Sh3gl3               | Mllt10                          | Trpv3                | RGD1561161           | Hsph1                           |
| Ubl7                 | Sh3d21               | Mir6327                         | Trpv2                | RGD1559493           | Homer3                          |
| Ube4a                | Sgms2                | Mir6324                         | Trpv1                | RGD1311899           | Hist2h4                         |
| Ube3d                | Sez6l                | Mir3568                         | Trpm1                | RGD1311892           | H3f3b                           |
| Ube3a                | Sez6                 | Mir3564                         | Trmt61a              | RGD1310769           | Gucy1b2                         |
| Ube2z                | Sertad4              | Mir346                          | Trmt13               | RGD1305298           | Gtl3                            |
| Ube2v2               | Serpinf2             | Mir338                          | Trmt10b              | Rfx7                 | Gtf2a1                          |
| Ube2s                | Serpina4             | Mir181a-1                       | Triqk                | Rffl                 | Gsn                             |
| Ube2g1               | Sema4d               | Mir125b-2                       | Trip11               | Rere                 | Gpr17                           |
| Ube2f                | Sele                 | Mical2                          | Trim41               | Reps1                | Gpd1                            |
| Ube2e3               | Sdccag8              | MGC94891                        | Trim29               | Ren                  | Golga1                          |
| Ubc                  | Scube1               | Metap1                          | Trim27               | Relt                 | Gnb2                            |
| Ubb                  | Scgn                 | Med27                           | Trhr                 | Rbm45                | Gmpr                            |
| Uald1                | Scand1               | Mbp                             | Trex1                | Rb1cc1               | Gltf                            |
| Uaca                 | Sbf1                 | Mar2                            | Trem2                | Raver1               | Gins2                           |
| Tyw5                 | Samd4b               | Mapkapk5                        | Treh                 | Rasgrp3              | Gas7                            |
| Tyw1                 | Sag                  | Map4k4                          | Trappc9              | Ranbp17              | Galnt10                         |
| Txnip                | S100b                | Mag                             | Trappc2l             | Ran                  | Gadd45g                         |
| Txndc8               | Rybp                 | Lypla2                          | Trak1                | Ralgds               | Fzd5                            |
| Txndc2               | Rxra                 | Lphn1                           | Trafd1               | Rac1                 | Fxn                             |
| Txndc11              | Ruvbl2               | LOC691153                       | Traf4                | Rab6b                | Fuk                             |
| Twf1                 | Rtn4                 | LOC683897                       | Traf2                | Rab4a                | Frmd4a                          |
| Tvp23b               | Rsu1                 | LOC502684                       | Tra2b                | Rab40c               | Foxo3                           |
| Tubgcp3              | Rps3                 | LOC100362981                    | Tpx2                 | Rab10                | Foxk1                           |
| Tubb6                | Rps17                | Lipogenin                       | Tpte2                | Pum1                 | Fos                             |
| Tubb5                | Rpl13a               | Limd1                           | Tpt1                 | Ptgfr                | Fgf1                            |
| Tubb3                | Rnf185               | Limch1                          | Tpr                  | Psrc1                | Fgd2                            |
| Tubb2a               | Riok3                | Lgals8                          | Tpp2                 | Psmb7                | Fem1b                           |
| Tuba1b               | Rinl                 | Lcat                            | Tpm4                 | Psd2                 | Fbxo31                          |

| <u>Egr2-specific</u> | <u>Myrf-specific</u> | <u>Both</u><br><u>Egr2/Myrf</u> | <u>Egr2-specific</u> | <u>Myrf-specific</u> | <u>Both</u><br><u>Egr2/Myrf</u> |
|----------------------|----------------------|---------------------------------|----------------------|----------------------|---------------------------------|
| Tpm1                 | Prune                | Fam83f                          | Tmem167b             | Pdk2                 | Btg2                            |
| Tpi1                 | Prtg                 | Fam53b                          | Tmem165              | Pde4d                | Brf1                            |
| Tpcn2                | Prpf6                | Fam207a                         | Tmem14a              | Pde4b                | Bod1                            |
| Tpbg                 | Prox1                | Fam178b                         | Tmem128              | Pdcd4                | Bcas1                           |
| Tp53i13              | Prok2                | Fam134b                         | Tmem120b             | Pcyt2                | Bcar1                           |
| Tp53i11              | Prkcz                | Fam129b                         | Tmem110              | Pcsk6                | Bcan                            |
| Tox4                 | Prima1               | Fa2h                            | Tmem107              | Pcgf5                | Bbx                             |
| Tor1aip2             | Prickle2             | Exoc2                           | Tmed2                | Parp3                | Atpaf2                          |
| Tor1a                | Prex1                | Exoc1                           | Tmed1                | Papss2               | Atf1                            |
| Top2a                | Pragmin              | Elmo1                           | Tmbim6               | Paox                 | Asb8                            |
| Top1mt               | Ppp2r5a              | Ebf2                            | Tm4sf5               | Panx1                | Arl6                            |
| Tomm40l              | Ppp2r1b              | Dusp15                          | Tlr5                 | Pank4                | Arhgef7                         |
| Tomm20               | Ppp1r36              | Dstyf                           | Tlr10                | Pak7                 | Arhgef37                        |
| Tom1                 | Ppp1r14a             | Ddx59                           | Tlk2                 | Pafah1b2             | Arhgef2                         |
| Tob1                 | Ppib                 | Ddx55                           | Tle3                 | Pacsin2              | Ap3b1                           |
| Tns4                 | Ppfibp2              | Ddx1                            | Tle2                 | Otx1                 | Amz1                            |
| Tns1                 | Pou3f3               | Dcun1d4                         | Tle1                 | Otub1                | Ahi1                            |
| Tnrc6b               | Popdc3               | Dclk1                           | Tkt                  | Otos                 | Ahdc1                           |
| Tnn                  | Polr2h               | Cyth1                           | Tjp2                 | Otop3                | Ago2                            |
| Tnfrsf26             | Pnrc1                | Cyp7b1                          | Timp2                | Otop2                | Adamts2                         |
| Tnfrsf19             | Pnp                  | Cxxc5                           | Thrap3               | Opalin               | Adamts1                         |
| Tnfaip8              | Plxnb3               | Ctnn                            | Thpo                 | Olr1641              | Adam15                          |
| Tmx4                 | Pln                  | Csrnp3                          | Thop1                | Olfm4                | Adam11                          |
| Tmprss7              | Plin2                | Crtc1                           | Thoc7                | Odf2l                | Actb                            |
| Tmprss4              | Plekho1              | Crtam                           | Thnsl1               | Odf1                 | Acp2                            |
| Tmpo                 | Plekhj1              | Cpvl                            | Thbs4                | Oacyl                | Abl1                            |
| Tmf1                 | Plekhg1              | Cplx2                           | Thap6                | Nusap1               | Abca2                           |
| Tmem97               | Plekha1              | Coro1c                          | Thap4                | Nupl2                |                                 |
| Tmem88               | Pld2                 | Cnot6                           | Tgif2                | Nudt4                |                                 |
| Tmem87b              | Plcl1                | Cnm4                            | Tgfb1                | Nudt14               |                                 |
| Tmem86a              | Pknox1               | Cmtm6                           | Tg                   | Nudt13               |                                 |
| Tmem42               | Piwil1               | Clip2                           | Tfrf                 | Nucb2                |                                 |
| Tmem30a              | Pid1                 | Clic4                           | Tfdp2                | Nubpl                |                                 |
| Tmem255b             | Picalm               | Chst3                           | Tfb1m                | Nuak1                |                                 |
| Tmem248              | Pi16                 | Cerk                            | Tfap2a               | Nrf1                 |                                 |
| Tmem225              | Phtf1                | Cdk2ap1                         | Tex10                | Nr2f6                |                                 |
| Tmem208              | Phlda2               | Cdh13                           | Tenm3                | Nle1                 |                                 |
| Tmem204              | Phgdh                | Cdc6                            | Tekt5                | Nkx6-2               |                                 |
| Tmem184c             | Phb                  | Cd82                            | Tekt3                | Nfib                 |                                 |
| Tmem184b             | Pgrmc2               | Cd48                            | Tef                  | Nfia                 |                                 |
| Tmem184a             | Pex14                | Ccsap                           | Tec                  | Neurod2              |                                 |
| Tmem182              | Pex11g               | Ccna1                           | Tdrd7                | Necap1               |                                 |
| Tmem181              | Pex10                | Ccdc67                          | Tctn1                | Necab2               |                                 |
| Tmem170b             | Pdzrn3               | Cbr4                            | Tctex1d1             | Ndufs4               |                                 |
| Tmem17               | Pdlim3               | Cacna1h                         | Tcof1                | Ndst1                |                                 |

| <u>Egr2-specific</u> | <u>Myrf-specific</u> | <u>Both</u><br><u>Egr2/Myrf</u> | <u>Egr2-specific</u> | <u>Myrf-specific</u> | <u>Both</u><br><u>Egr2/Myrf</u> |
|----------------------|----------------------|---------------------------------|----------------------|----------------------|---------------------------------|
| Tchp                 | Ncald                |                                 | Supv3l1              | Mfng                 |                                 |
| Tcf4                 | Nars                 |                                 | Supt16h              | Mex3b                |                                 |
| Tcf12                | Nap1l5               |                                 | Sumo3                | Mettl7a              |                                 |
| Tceb2                | Nacad                |                                 | Sumo1                | Mettl5               |                                 |
| Tcea1                | Naa15                |                                 | Sumf2                | Mettl24              |                                 |
| Tbx4                 | Myrf                 |                                 | Sult5a1              | Med7                 |                                 |
| Tbx20                | Mybphl               |                                 | Sult1e1              | Med4                 |                                 |
| Tbx2                 | Mybbp1a              |                                 | Sult1c3              | Me2                  |                                 |
| Tbr1                 | Mxd4                 |                                 | Sult1c2a             | Mdm2                 |                                 |
| Tbk1                 | Mvp                  |                                 | Sult1a1              | Mdga1                |                                 |
| Tbce                 | Mvb12b               |                                 | Suco                 | Mcoln3               |                                 |
| Tbcd                 | Mum1                 |                                 | Suclg1               | Mc2r                 |                                 |
| Tbcc                 | Mtrr                 |                                 | Sucla2               | Mbl2                 |                                 |
| Tbc1d31              | Mtor                 |                                 | Styxl1               | Matk                 |                                 |
| Tbc1d2b              | Mtmr12               |                                 | Stxbp6               | Mars                 |                                 |
| Tbc1d14              | Mtfr1l               |                                 | Stxbp5l              | Mar11                |                                 |
| Tas2r134             | Mstn                 |                                 | Stxbp3               | Mapkapk3             |                                 |
| Tas2r129             | Msra                 |                                 | Stx6                 | Mapk7                |                                 |
| Tas2r110             | Msantd3              |                                 | Stx12                | Mapk6                |                                 |
| Tars                 | Mrps2                |                                 | Stx11                | Map7                 |                                 |
| Tardbp               | Mrps10               |                                 | Strn3                | Map6d1               |                                 |
| Taok3                | Mpped2               |                                 | Strn                 | Map1a                |                                 |
| Taldo1               | Mpdz                 |                                 | Stradb               | Man2a1               |                                 |
| Tagln                | Mpc1                 |                                 | Strada               | Mael                 |                                 |
| Taf3                 | Mogat2               |                                 | Stox2                | Macf1                |                                 |
| Taf2                 | Mob4                 |                                 | Stmn1                | Lzts2                |                                 |
| Tada2a               | Mmd2                 |                                 | Stk38                | Ly6g5c               |                                 |
| Tacc1                | Mmadhc               |                                 | Stk32a               | Ly6c                 |                                 |
| Tab1                 | Mllt4                |                                 | Stk25                | Luzp1                |                                 |
| Szrd1                | Mir99a               |                                 | Stk10                | Luc7l3               |                                 |
| Syvn1                | Mir9-1               |                                 | Stim2                | Lrrc52               |                                 |
| Syt13                | Mir802               |                                 | Stfa3                | Lrrc4                |                                 |
| Syt7                 | Mir675               |                                 | ste2                 | Lrrc39               |                                 |
| Syt4                 | Mir6334              |                                 | Stat5a               | Lrrc3                |                                 |
| Syt10                | Mir384               |                                 | Stat3                | Lrp3                 |                                 |
| Synpo                | Mir3597-1            |                                 | Stard5               | Lrp1                 |                                 |
| Synj1                | Mir204               |                                 | Stard4               | Lpcat4               |                                 |
| Syngap1              | Mir202               |                                 | Stard3nl             | Lpar4                |                                 |
| Syna                 | Mir17-1              |                                 | Stam                 | Lpar1                |                                 |
| Syce3                | Minos1               |                                 | Stag1                | LOC688765            |                                 |
| Swap70               | Micu3                |                                 | Stab2                | LOC687707            |                                 |
| Svip                 | Micu2                |                                 | St8sia5              | LOC619574            |                                 |
| Svil                 | Mical3               |                                 | St6galnac1           | LOC500956            |                                 |
| Suv420h2             | Mgea5                |                                 | St3gal6              | LOC499643            |                                 |
| Susd4                | Mgat5b               |                                 | St13                 | LOC499339            |                                 |

| <u>Egr2-specific</u> | <u>Myrf-specific</u> | <u>Both</u><br><u>Egr2/Myrf</u> | <u>Egr2-specific</u> | <u>Myrf-specific</u> | <u>Both</u><br><u>Egr2/Myrf</u> |
|----------------------|----------------------|---------------------------------|----------------------|----------------------|---------------------------------|
| Ssfa2                | LOC498236            |                                 | Snx16                | Irs2                 |                                 |
| Ssb                  | LOC361016            |                                 | Snx15                | Irgq                 |                                 |
| Srsf9                | Lgl1                 |                                 | Snx11                | Irf9                 |                                 |
| Srsf7                | Litaf                |                                 | Sntg1                | Irf2                 |                                 |
| Srsf3                | Lingo4               |                                 | Sntb2                | Ippk                 |                                 |
| Srsf2                | Lingo3               |                                 | Snta1                | Ipo13                |                                 |
| Srsf10               | Lin28c               |                                 | Snrpg                | Insig1               |                                 |
| Srsf1                | Lifr                 |                                 | Snrpc                | Il23a                |                                 |
| Srrm1                | Lif                  |                                 | Snn                  | Il12a                |                                 |
| Srgap2               | Lhx5                 |                                 | Snf8                 | Ift52                |                                 |
| Srf                  | Lgmn                 |                                 | Sncg                 | Ift43                |                                 |
| Srd5a3               | Ldlrap1              |                                 | Sncaip               | Ifitm3               |                                 |
| Src                  | Ldb3                 |                                 | Snpc2                | Htra1                |                                 |
| Sqstm1               | Laptm4a              |                                 | Snap29               | Hspbp1               |                                 |
| Sqle                 | Krt42                |                                 | Smurf2               | Hps4                 |                                 |
| Sptb                 | Klhl24               |                                 | Smtn                 | Hmgb4                |                                 |
| Spsb2                | Klf13                |                                 | Smpd3                | Hmcn1                |                                 |
| Spry3                | Kit                  |                                 | Smim14               | Hm13                 |                                 |
| Spry2                | Kin                  |                                 | Smg7                 | Hemk1                |                                 |
| Spop                 | Kif9                 |                                 | Smcr8                | Heatr6               |                                 |
| Spock2               | Kif3b                |                                 | Smarcd2              | Hcn2                 |                                 |
| Spn                  | Kif26a               |                                 | Smarcc1              | Hapln2               |                                 |
| Spire2               | Kif1b                |                                 | Smarcal1             | Gtf3c2               |                                 |
| Spire1               | Kif13b               |                                 | Smarca5              | Gskip                |                                 |
| Spink14              | Kif13a               |                                 | Smcp2                | Grm1                 |                                 |
| Sphk1                | Kctd5                |                                 | Smad4                | Grik5                |                                 |
| Specc1               | Kcnq3                |                                 | Smad3                | Grid2ip              |                                 |
| Spc25                | Kcnk13               |                                 | Smad2                | Grid1                |                                 |
| Spata5l1             | Kcnh5                |                                 | Slmo1                | Gramd3               |                                 |
| Spata33              | Kcnb1                |                                 | Slmap                | Gpr37                |                                 |
| Spata3               | Kcna6                |                                 | Slitrk1              | Gpr113               |                                 |
| Spata21              | Kcna5                |                                 | Slit3                | Gphb5                |                                 |
| Spata13              | Kbtbd8               |                                 | Slfn2                | Gpd2                 |                                 |
| Spag9                | Katnal1              |                                 | Slco4c1              | Gpa33                |                                 |
| Spag7                | Kat5                 |                                 | Slc9b2               | Gp1bb                |                                 |
| Sp4                  | Jph3                 |                                 | Slc9a3r1             | Gorasp2              |                                 |
| Sp100                | Josd2                |                                 | Slc9a3               | Gng13                |                                 |
| Sox4                 | Jakmip3              |                                 | Slc7a6os             | Glt6d1               |                                 |
| Sox2                 | Itpk1                |                                 | Slc7a5               | Gjd2                 |                                 |
| Sorcs2               | Itn2a                |                                 | Slc7a13              | Gja10                |                                 |
| Sorbs3               | Itga6                |                                 | Slc6a4               | Gipc2                |                                 |
| Socs2                | Ist1                 |                                 | Slc6a2               | Gins4                |                                 |
| Snx8                 | Isoc1                |                                 | Slc6a1               | Gfra2                |                                 |
| Snx24                | Isca1                |                                 | Slc51a               | Gfod1                |                                 |
| Snx18                | Irx5                 |                                 | Slc4a3               | Gfer                 |                                 |

| <u>Egr2-specific</u> | <u>Myrf-specific</u> | <u>Both</u><br><u>Egr2/Myrf</u> | <u>Egr2-specific</u> | <u>Myrf-specific</u> | <u>Both</u><br><u>Egr2/Myrf</u> |
|----------------------|----------------------|---------------------------------|----------------------|----------------------|---------------------------------|
| Slc44a2              | Gbp2                 |                                 | Shisa4               | Entpd6               |                                 |
| Slc44a1              | Galnt2               |                                 | Shfm1                | Eml2                 |                                 |
| Slc39a6              | Gadd45a              |                                 | Shc4                 | Elf3                 |                                 |
| Slc38a9              | Gad2                 |                                 | Sh3bp5               | Elavl3               |                                 |
| Slc38a2              | Gabrg1               |                                 | Sh2d4b               | Eif4h                |                                 |
| Slc36a4              | Gabra5               |                                 | Sh2b2                | Eif4b                |                                 |
| Slc36a3              | Fuca2                |                                 | Sgsm2                | Eif3l                |                                 |
| Slc36a2              | Fstl1                |                                 | Sgol2                | Eif1b                |                                 |
| Slc36a1              | Foxk2                |                                 | Sgcb                 | Ehd1                 |                                 |
| Slc35g2              | Foxj3                |                                 | Sgca                 | Ece1                 |                                 |
| Slc35e2b             | Foxi3                |                                 | Sfxn1                | Ebag9                |                                 |
| Slc35a1              | Fnbp1l               |                                 | Sfswap               | E2f1                 |                                 |
| Slc31a2              | Fmod                 |                                 | Sfmbt2               | Dynlrb2              |                                 |
| Slc30a9              | Fmo5                 |                                 | Sf3b3                | Dusp7                |                                 |
| Slc2a5               | Fmo4                 |                                 | Setl1                | Dusp1                |                                 |
| Slc28a3              | Fgfr3                |                                 | Setd8                | Dsn1                 |                                 |
| Slc27a6              | Fgfr2                |                                 | Setd5                | Dram1                |                                 |
| Slc27a4              | Fgfr1                |                                 | Sesn2                | Dpysl5               |                                 |
| Slc27a1              | Fcho1                |                                 | Sertad2              | Dpy30                |                                 |
| Slc26a9              | Fbxo6                |                                 | Sertad1              | Dnmt3a               |                                 |
| Slc26a2              | Fbxo32               |                                 | Serpinh1             | Dnm2                 |                                 |
| Slc25a4              | Fbxo11               |                                 | Serpinf1             | Dnajc5b              |                                 |
| Slc25a37             | Fbxl7                |                                 | Serpine2             | Dnajb2               |                                 |
| Slc25a17             | Fbxl17               |                                 | Serpinb7             | Dnai2                |                                 |
| Slc25a10             | Fat1                 |                                 | Sept9                | Dlgap4               |                                 |
| Slc25a1              | Fastkd2              |                                 | Sept8                | Dkk3                 |                                 |
| Slc24a6              | Fam98a               |                                 | Sept7                | Dis3                 |                                 |
| Slc1a2               | Fam83d               |                                 | Senp8                | Dhx33                |                                 |
| Slc17a5              | Fam76b               |                                 | Senp7                | Dgkz                 |                                 |
| Slc17a3              | Fam49a               |                                 | Senp6                | Dgki                 |                                 |
| Slc17a2              | Fam229a              |                                 | Sema7a               | Dgka                 |                                 |
| Slc15a4              | Fam212a              |                                 | Sema6c               | Ddx31                |                                 |
| Slc13a1              | Fam19a5              |                                 | Sema4c               | Ddr2                 |                                 |
| Slamf7               | Fam196a              |                                 | Sema3b               | Ddr1                 |                                 |
| Slain2               | Fam122a              |                                 | Selrc1               | Ddost                |                                 |
| Ska2                 | Fam110a              |                                 | Selplg               | Dclre1c              |                                 |
| Ska1                 | Faim2                |                                 | Selm                 | Dcaf10               |                                 |
| Sirt4                | Fah                  |                                 | Sell                 | Dbndd2               |                                 |
| Sipa1l2              | Fabp6                |                                 | Selk                 | Dapl1                |                                 |
| Sipa1l1              | Fabp3                |                                 | Seli                 | Dagla                |                                 |
| Sipa1                | Etv6                 |                                 | Secisbp2l            | Cyp24a1              |                                 |
| Sin3a                | Espnl                |                                 | Sec63                | Cyb5r2               |                                 |
| Siah1a               | Ern1                 |                                 | Sec61a2              | Cyb5d2               |                                 |
| Siae                 | Erf                  |                                 | Sec24a               | Cxadr1l              |                                 |
| Shpk                 | Epn2                 |                                 | Sec22b               | Cux2                 |                                 |

| <u>Egr2-specific</u> | <u>Myrf-specific</u> | <u>Both</u><br><u>Egr2/Myrf</u> | <u>Egr2-specific</u> | <u>Myrf-specific</u> | <u>Both</u><br><u>Egr2/Myrf</u> |
|----------------------|----------------------|---------------------------------|----------------------|----------------------|---------------------------------|
| Sec22a               | Ctdp1                |                                 | RT1-CE14             | Ccno                 |                                 |
| Sec14l5              | Ctbp1                |                                 | RT1-CE12             | Ccnjl                |                                 |
| Sec14l1              | Csrnp1               |                                 | RT1-CE11             | Ccna2                |                                 |
| Sdsl                 | Csf1                 |                                 | RT1-A1               | Ccdc28a              |                                 |
| Sdr42e1              | Creld2               |                                 | Rsrc2                | Ccdc182              |                                 |
| Sdpr                 | Crb2                 |                                 | Rspry1               | Ccdc167              |                                 |
| Sdk2                 | Cox7a2l              |                                 | Rsl1d1               | Ccdc148              |                                 |
| Sdhc                 | Cox7a2               |                                 | RSA-14-44            | Cbx7                 |                                 |
| Sde2                 | Cox6c-ps1            |                                 | Rrp9                 | Cbfb                 |                                 |
| Sdc4                 | Coq7                 |                                 | Rreb1                | Casc5                |                                 |
| Sdc3                 | Col9a2               |                                 | Rqcd1                | Carkd                |                                 |
| Sdad1                | Cobl                 |                                 | Rptor                | Capns2               |                                 |
| Scyl1                | Cntn2                |                                 | Rps7                 | Camk2n1              |                                 |
| Scp2d1               | Cnksr3               |                                 | Rps6kb2              | Camk2g               |                                 |
| Scp2                 | Cnga3                |                                 | Rps6ka5              | Camk2b               |                                 |
| Scfd1                | Cmip                 |                                 | Rps29                | Cacng3               |                                 |
| Scd                  | Clptm1l              |                                 | Rps24                | Cacna1i              |                                 |
| Sccpdh               | Clip3                |                                 | Rps16                | Cacna1a              |                                 |
| Scamp5               | Clec2l               |                                 | Rps13                | Cabin1               |                                 |
| Scamp3               | Cldn15               |                                 | Rpp40                | Bzw1                 |                                 |
| Scaf11               | Cldn11               |                                 | Rplp0                | Bnip3                |                                 |
| Sbno1                | Clca2                |                                 | Rpl9                 | Bfsp2                |                                 |
| Sarnp                | Clasp2               |                                 | Rpl8                 | Bdkrb1               |                                 |
| Sardh                | Ckap2                |                                 | Rpl4                 | Bcl2l1               |                                 |
| Sap30bp              | Chst13               |                                 | Rpl35                | Barhl1               |                                 |
| Samsn1               | Chmp7                |                                 | Rpl30                | Bach1                |                                 |
| Samhd1               | Chic2                |                                 | Rpl3                 | B4galt5              |                                 |
| Samd14               | Chchd1               |                                 | Rpl27a               | Atp6v1g1             |                                 |
| Sacm1l               | Chac1                |                                 | Rpl24                | Atp6v1d              |                                 |
| S1pr3                | Cercam               |                                 | Rpl23a               | Atp5h                |                                 |
| S100pbp              | Celf6                |                                 | Rpl23                | Atp2b4               |                                 |
| S100a6               | Cel                  |                                 | Rpl22l1              | Atp1b3               |                                 |
| S100a3               | Ceacam9              |                                 | Rpl22                | Atoh8                |                                 |
| Rwdd4                | Cds2                 |                                 | Rpl12                | Atl2                 |                                 |
| Runx2                | Cdon                 |                                 | Rph3a                | Atg5                 |                                 |
| Runx1t1              | Cdkn1c               |                                 | Rpe                  | Ascc2                |                                 |
| Rtp1                 | Cdk18                |                                 | Rpap2                | Arv1                 |                                 |
| Rtn4rl2              | Cdip1                |                                 | Ros1                 | Arsb                 |                                 |
| Rtkn2                | Cdh3                 |                                 | Rogdi                | Arhgef3              |                                 |
| Rtcd1                | Cdc37l1              |                                 | Rock1                | Arfgef2              |                                 |
| RT1-M10-1            | Cdc16                |                                 | Robo4                | Apoa1bp              |                                 |
| RT1-CE6              | Cda                  |                                 | Rnf7                 | Apln                 |                                 |
| RT1-CE5              | Cd9                  |                                 | Rnf6                 | Apbb1                |                                 |
| RT1-CE4              | Cd27                 |                                 | Rnf5                 | Apba2                |                                 |
| RT1-CE2              | Cd180                |                                 | Rnf44                | Aox3                 |                                 |



| <u>Egr2-specific</u> | <u>Myrf-specific</u> | <u>Both</u><br><u>Egr2/Myrf</u> | <u>Egr2-specific</u> | <u>Myrf-specific</u> | <u>Both</u><br><u>Egr2/Myrf</u> |
|----------------------|----------------------|---------------------------------|----------------------|----------------------|---------------------------------|
| Rnf41                | Aoc1                 |                                 | RGD1564149           |                      |                                 |
| Rnf4                 | Ankrd1               |                                 | RGD1564114           |                      |                                 |
| Rnf39                | Ampd3                |                                 | RGD1563482           |                      |                                 |
| Rnf38                | Alx4                 |                                 | RGD1563263           |                      |                                 |
| Rnf34                | Allc                 |                                 | RGD1563222           |                      |                                 |
| Rnf24                | Akirin2              |                                 | RGD1563015           |                      |                                 |
| Rnf216               | Agpat5               |                                 | RGD1562673           |                      |                                 |
| Rnf19a               | Ago3                 |                                 | RGD1562658           |                      |                                 |
| Rnf181               | Ago1                 |                                 | RGD1562310           |                      |                                 |
| Rnf167               | Agmat                |                                 | RGD1562229           |                      |                                 |
| Rnf145               | Agap1                |                                 | RGD1562161           |                      |                                 |
| Rnf139               | Adra1d               |                                 | RGD1562136           |                      |                                 |
| Rnf138               | Adora3               |                                 | RGD1561676           |                      |                                 |
| Rnf123               | Adi1                 |                                 | RGD1560212           |                      |                                 |
| Rnf112               | Adar                 |                                 | RGD1559896           |                      |                                 |
| Rnf111               | Ada                  |                                 | RGD1559536           |                      |                                 |
| Rnf10                | Acy3                 |                                 | RGD1559442           |                      |                                 |
| Rnd3                 | Acvrl1               |                                 | RGD1359108           |                      |                                 |
| Rnaseh2b             | Actn4                |                                 | RGD1312005           |                      |                                 |
| Rnaseh2a             | Acot2                |                                 | RGD1311805           |                      |                                 |
| Rnase4               | Acadm                |                                 | RGD1311747           |                      |                                 |
| Rmrp                 | Abr                  |                                 | RGD1311517           |                      |                                 |
| Rmnd5b               | Abhd17c              |                                 | RGD1311343           |                      |                                 |
| Rln3                 | Abhd17b              |                                 | RGD1310572           |                      |                                 |
| Ripply3              | Abcb4                |                                 | RGD1310429           |                      |                                 |
| Ripk1                |                      |                                 | Rgd1310049           |                      |                                 |
| Riok1                |                      |                                 | RGD1309808           |                      |                                 |
| Rin2                 |                      |                                 | RGD1309779           |                      |                                 |
| Rhot2                |                      |                                 | RGD1309748           |                      |                                 |
| Rhot1                |                      |                                 | RGD1309534           |                      |                                 |
| Rhbdl1               |                      |                                 | RGD1309492           |                      |                                 |
| Rhbdd2               |                      |                                 | RGD1309362           |                      |                                 |
| Rgs8                 |                      |                                 | RGD1308923           |                      |                                 |
| Rgs21                |                      |                                 | RGD1308706           |                      |                                 |
| Rgs12                |                      |                                 | RGD1308601           |                      |                                 |
| Rgl2                 |                      |                                 | RGD1308428           |                      |                                 |
| RGD735029            |                      |                                 | RGD1308147           |                      |                                 |
| RGD1566320           |                      |                                 | RGD1307704           |                      |                                 |
| RGD1566226           |                      |                                 | RGD1307461           |                      |                                 |
| RGD1565784           |                      |                                 | RGD1307315           |                      |                                 |
| RGD1565616           |                      |                                 | RGD1307155           |                      |                                 |
| RGD1565367           |                      |                                 | RGD1306941           |                      |                                 |
| RGD1564865           |                      |                                 | RGD1306772           |                      |                                 |
| RGD1564428           |                      |                                 | RGD1306626           |                      |                                 |
| RGD1564379           |                      |                                 | RGD1306195           |                      |                                 |

| <u>Egr2-specific</u> | <u>Myrf-specific</u> | <u>Both</u><br><u>Egr2/Myrf</u> | <u>Egr2-specific</u> | <u>Myrf-specific</u> | <u>Both</u><br><u>Egr2/Myrf</u> |
|----------------------|----------------------|---------------------------------|----------------------|----------------------|---------------------------------|
| RGD1306063           |                      |                                 | Rara                 |                      |                                 |
| RGD1305938           |                      |                                 | Raph1                |                      |                                 |
| RGD1305928           |                      |                                 | Rapgef6              |                      |                                 |
| RGD1305645           |                      |                                 | Rapgef5              |                      |                                 |
| RGD1305627           |                      |                                 | Rap2b                |                      |                                 |
| RGD1305537           |                      |                                 | Rap2a                |                      |                                 |
| RGD1305455           |                      |                                 | Rap1gap              |                      |                                 |
| RGD1304982           |                      |                                 | Rap1b                |                      |                                 |
| RGD1304704           |                      |                                 | Ranbp2               |                      |                                 |
| RGD1304694           |                      |                                 | Ranbp10              |                      |                                 |
| RGD1304567           |                      |                                 | Ralgapb              |                      |                                 |
| Rfwd2                |                      |                                 | Rala                 |                      |                                 |
| Rfc2                 |                      |                                 | Rai2                 |                      |                                 |
| Rfc1                 |                      |                                 | Rai14                |                      |                                 |
| Rev3l                |                      |                                 | Rag1                 |                      |                                 |
| Retnlg               |                      |                                 | Radil                |                      |                                 |
| Rergl                |                      |                                 | Rad54l               |                      |                                 |
| Rell1                |                      |                                 | Rad50                |                      |                                 |
| Reep3                |                      |                                 | Rad23a               |                      |                                 |
| Reep2                |                      |                                 | Rabgef1              |                      |                                 |
| Rdx                  |                      |                                 | Rabep1               |                      |                                 |
| Rdm1                 |                      |                                 | Rab8b                |                      |                                 |
| Rdh8                 |                      |                                 | Rab7b                |                      |                                 |
| Rcsd1                |                      |                                 | Rab6a                |                      |                                 |
| Rcn2                 |                      |                                 | Rab40b               |                      |                                 |
| Rcn1                 |                      |                                 | Rab3ip               |                      |                                 |
| Rbpj                 |                      |                                 | Rab3gap2             |                      |                                 |
| Rbm4b                |                      |                                 | Rab36                |                      |                                 |
| Rbm39                |                      |                                 | Rab2a                |                      |                                 |
| Rbm34                |                      |                                 | Rab28                |                      |                                 |
| Rbm26                |                      |                                 | Rab22a               |                      |                                 |
| Rbm25                |                      |                                 | Rab20                |                      |                                 |
| Rbm22                |                      |                                 | Rab1a                |                      |                                 |
| Rbfox2               |                      |                                 | Rab17                |                      |                                 |
| Rbfox1               |                      |                                 | Rab11a               |                      |                                 |
| Rbfa                 |                      |                                 | Qtrt1                |                      |                                 |
| Rbbp7                |                      |                                 | Qser1                |                      |                                 |
| Rbbp5                |                      |                                 | Qrs1                 |                      |                                 |
| Rassf4               |                      |                                 | Qk                   |                      |                                 |
| Rassf3               |                      |                                 | Pygl                 |                      |                                 |
| Ras111b              |                      |                                 | Pxn                  |                      |                                 |
| Ras110b              |                      |                                 | Pxdc1                |                      |                                 |
| Rasd2                |                      |                                 | Pvrl3                |                      |                                 |
| Rasal2               |                      |                                 | Puf60                |                      |                                 |
| Rasa3                |                      |                                 | Pttg1ip              |                      |                                 |

| <u>Egr2-specific</u> | <u>Myrf-specific</u> | <u>Both</u><br><u>Egr2/Myrf</u> | <u>Egr2-specific</u> | <u>Myrf-specific</u> | <u>Both</u><br><u>Egr2/Myrf</u> |
|----------------------|----------------------|---------------------------------|----------------------|----------------------|---------------------------------|
| Ptrhd1               |                      |                                 | Prnp                 |                      |                                 |
| Ptrh2                |                      |                                 | Prmt5                |                      |                                 |
| Ptpr                 |                      |                                 | Pr17a4               |                      |                                 |
| Ptprm                |                      |                                 | Pr15a2               |                      |                                 |
| Ptprj                |                      |                                 | Prkrip1              |                      |                                 |
| Ptpre                |                      |                                 | Prkd1                |                      |                                 |
| Ptprc                |                      |                                 | Prkcsh               |                      |                                 |
| Ptpra                |                      |                                 | Prkce                |                      |                                 |
| Ptpn20b              |                      |                                 | Prkar2a              |                      |                                 |
| Ptpn2                |                      |                                 | Prkag2               |                      |                                 |
| Ptplad2              |                      |                                 | Prkaca               |                      |                                 |
| Ptpla                |                      |                                 | Prkaa2               |                      |                                 |
| Ptpdc1               |                      |                                 | Prim2                |                      |                                 |
| Ptges3l1             |                      |                                 | Prep                 |                      |                                 |
| Ptger4               |                      |                                 | Prdm4                |                      |                                 |
| Pter                 |                      |                                 | Prdm2                |                      |                                 |
| Ptch1                |                      |                                 | Prdm11               |                      |                                 |
| Ptbp3                |                      |                                 | Pptc7                |                      |                                 |
| Ptbp1                |                      |                                 | Ppp4r2               |                      |                                 |
| Psph                 |                      |                                 | Ppp3r1               |                      |                                 |
| Pspc1                |                      |                                 | Ppp3cb               |                      |                                 |
| Psmg4                |                      |                                 | Ppp3ca               |                      |                                 |
| Psmg1                |                      |                                 | Ppp2r5c              |                      |                                 |
| Psme4                |                      |                                 | Ppp2r4               |                      |                                 |
| Psmd9                |                      |                                 | Ppp2r3a              |                      |                                 |
| Psmd7                |                      |                                 | Ppp2r2a              |                      |                                 |
| Psmd12               |                      |                                 | Ppp1r8               |                      |                                 |
| Psmc6                |                      |                                 | Ppp1r35              |                      |                                 |
| Psmc3                |                      |                                 | Ppp1r1c              |                      |                                 |
| Psma1                |                      |                                 | Ppp1r15b             |                      |                                 |
| Psen2                |                      |                                 | Ppp1r12b             |                      |                                 |
| Psat1                |                      |                                 | Ppp1r11              |                      |                                 |
| Psap                 |                      |                                 | Ppp1r10              |                      |                                 |
| Prx                  |                      |                                 | Ppp1cc               |                      |                                 |
| Prtfdc1              |                      |                                 | Ppp1cb               |                      |                                 |
| Prss3                |                      |                                 | Ppm1d                |                      |                                 |
| Prrx1                |                      |                                 | Ppm1b                |                      |                                 |
| Prrt1                |                      |                                 | Ppfia1               |                      |                                 |
| Prrg4                |                      |                                 | Ppargc1b             |                      |                                 |
| Prr5l                |                      |                                 | Ppard                |                      |                                 |
| Prr16                |                      |                                 | Ppapdc1b             |                      |                                 |
| Prpsap2              |                      |                                 | Ppap2b               |                      |                                 |
| Prpsap1              |                      |                                 | Ppa2                 |                      |                                 |
| Prph                 |                      |                                 | Ppa1                 |                      |                                 |
| Prpf4b               |                      |                                 | Pou3f2               |                      |                                 |

| <u>Egr2-specific</u> | <u>Myrf-specific</u> | <u>Both</u><br><u>Egr2/Myrf</u> | <u>Egr2-specific</u> | <u>Myrf-specific</u> | <u>Both</u><br><u>Egr2/Myrf</u> |
|----------------------|----------------------|---------------------------------|----------------------|----------------------|---------------------------------|
| Pou3f1               |                      |                                 | Pkib                 |                      |                                 |
| Pou2f1               |                      |                                 | Pkd1                 |                      |                                 |
| Por                  |                      |                                 | Pitrm1               |                      |                                 |
| Pop5                 |                      |                                 | Pitpnb               |                      |                                 |
| Pomp                 |                      |                                 | Pip4k2b              |                      |                                 |
| Pomk                 |                      |                                 | Pip4k2a              |                      |                                 |
| Pom121               |                      |                                 | Pin1                 |                      |                                 |
| Polr3k               |                      |                                 | Pim1                 |                      |                                 |
| Polr3f               |                      |                                 | Pik3r3               |                      |                                 |
| Polr2m               |                      |                                 | Pik3ip1              |                      |                                 |
| Polr2j               |                      |                                 | Pik3c3               |                      |                                 |
| Polr2f               |                      |                                 | Pik3ap1              |                      |                                 |
| Polr2b               |                      |                                 | Pigm                 |                      |                                 |
| Polr1b               |                      |                                 | Piezo1               |                      |                                 |
| Polg2                |                      |                                 | Pick1                |                      |                                 |
| Pold2                |                      |                                 | Pias4                |                      |                                 |
| Pola2                |                      |                                 | Pias1                |                      |                                 |
| Pofut2               |                      |                                 | Pi4kb                |                      |                                 |
| Poc1a                |                      |                                 | Phykpl               |                      |                                 |
| Pnpt1                |                      |                                 | Phyhip               |                      |                                 |
| Pnkd                 |                      |                                 | Phospho1             |                      |                                 |
| Pmp22                |                      |                                 | Phldb1               |                      |                                 |
| Pmaip1               |                      |                                 | Phlda3               |                      |                                 |
| Pm20d1               |                      |                                 | Phlda1               |                      |                                 |
| Plxnd1               |                      |                                 | Phkg1                |                      |                                 |
| Plxdc2               |                      |                                 | Phkb                 |                      |                                 |
| Plxdc1               |                      |                                 | Phf2                 |                      |                                 |
| Plvap                |                      |                                 | Phf13                |                      |                                 |
| Plscr2               |                      |                                 | Pglyrp3              |                      |                                 |
| Plod3                |                      |                                 | Pgf                  |                      |                                 |
| Plip                 |                      |                                 | Pgbd5                |                      |                                 |
| Plk5                 |                      |                                 | Pfn2                 |                      |                                 |
| Plk3                 |                      |                                 | Pfdn1                |                      |                                 |
| Plekhm2              |                      |                                 | Pfas                 |                      |                                 |
| Plekhg5              |                      |                                 | Pex5l                |                      |                                 |
| Plekhf1              |                      |                                 | Pex12                |                      |                                 |
| Plekhh1              |                      |                                 | Per1                 |                      |                                 |
| Plekha4              |                      |                                 | Peli2                |                      |                                 |
| Plec                 |                      |                                 | Pecr                 |                      |                                 |
| Plcb4                |                      |                                 | Pebp1                |                      |                                 |
| Plac8                |                      |                                 | Pdxdc1               |                      |                                 |
| Pla2g2a              |                      |                                 | Pds5b                |                      |                                 |
| Pla2g15              |                      |                                 | Pdrg1                |                      |                                 |
| Pla2g10              |                      |                                 | Pdp1                 |                      |                                 |
| Pknnox2              |                      |                                 | Pdlim7               |                      |                                 |

| <u>Egr2-specific</u> | <u>Myrf-specific</u> | <u>Both</u><br><u>Egr2/Myrf</u> | <u>Egr2-specific</u> | <u>Myrf-specific</u> | <u>Both</u><br><u>Egr2/Myrf</u> |
|----------------------|----------------------|---------------------------------|----------------------|----------------------|---------------------------------|
| Pdia4                |                      |                                 | Oxct1                |                      |                                 |
| Pdgfrb               |                      |                                 | Oxa1l                |                      |                                 |
| Pdgfa                |                      |                                 | Otud4                |                      |                                 |
| Pde7b                |                      |                                 | Otop1                |                      |                                 |
| Pde7a                |                      |                                 | Osbp12               |                      |                                 |
| Pdcl3                |                      |                                 | Osbp11               |                      |                                 |
| Pdcd7                |                      |                                 | Os9                  |                      |                                 |
| Pdcd1                |                      |                                 | Orc4                 |                      |                                 |
| Pdap1                |                      |                                 | Orai2                |                      |                                 |
| Pcyt1a               |                      |                                 | Opa1                 |                      |                                 |
| Pcp4                 |                      |                                 | Omg                  |                      |                                 |
| Pcna                 |                      |                                 | Omd                  |                      |                                 |
| Pcmt1                |                      |                                 | Olr943               |                      |                                 |
| Pcm1                 |                      |                                 | Olr869               |                      |                                 |
| Pcdhgc3              |                      |                                 | Olr820               |                      |                                 |
| Pcdhga5              |                      |                                 | Olr81                |                      |                                 |
| Pcdha5               |                      |                                 | Olr766               |                      |                                 |
| Pcdh7                |                      |                                 | Olr728               |                      |                                 |
| Pcdh15               |                      |                                 | Olr575               |                      |                                 |
| Pccb                 |                      |                                 | Olr513               |                      |                                 |
| Pbx3                 |                      |                                 | Olr441               |                      |                                 |
| Pars2                |                      |                                 | Olr434               |                      |                                 |
| Parp16               |                      |                                 | Olr400               |                      |                                 |
| Park7                |                      |                                 | Olr24                |                      |                                 |
| Pard6b               |                      |                                 | Olr23                |                      |                                 |
| Paqr7                |                      |                                 | Olr1750              |                      |                                 |
| Paqr6                |                      |                                 | Olr1744              |                      |                                 |
| Papolb               |                      |                                 | Olr1722              |                      |                                 |
| Papola               |                      |                                 | Olr171               |                      |                                 |
| Papd7                |                      |                                 | Olr1701              |                      |                                 |
| Papd5                |                      |                                 | Olr1512              |                      |                                 |
| Pank3                |                      |                                 | Olr1492              |                      |                                 |
| Pan2                 |                      |                                 | Olr1461              |                      |                                 |
| Palmd                |                      |                                 | Olr1417              |                      |                                 |
| Pald1                |                      |                                 | Olr1384              |                      |                                 |
| Pak2                 |                      |                                 | Olr1314              |                      |                                 |
| Pak1ip1              |                      |                                 | Olr1275              |                      |                                 |
| Paip2                |                      |                                 | Olr1254              |                      |                                 |
| Padi2                |                      |                                 | Olr1229              |                      |                                 |
| Pabpc2               |                      |                                 | Olr1158              |                      |                                 |
| Pabpc1               |                      |                                 | Olr1151              |                      |                                 |
| Pa2g4                |                      |                                 | Olr1142              |                      |                                 |
| P4hb                 |                      |                                 | Olr1137              |                      |                                 |
| P2ry2                |                      |                                 | Olr1117              |                      |                                 |
| P2rx7                |                      |                                 | Olr1115              |                      |                                 |

| <u>Egr2-specific</u> | <u>Myrf-specific</u> | <u>Both</u><br><u>Egr2/Myrf</u> | <u>Egr2-specific</u> | <u>Myrf-specific</u> | <u>Both</u><br><u>Egr2/Myrf</u> |
|----------------------|----------------------|---------------------------------|----------------------|----------------------|---------------------------------|
| Olr1051              |                      |                                 | Nop2                 |                      |                                 |
| Ogn                  |                      |                                 | Nomo1                |                      |                                 |
| Ogfod1               |                      |                                 | Nol3                 |                      |                                 |
| Oaf                  |                      |                                 | Nog                  |                      |                                 |
| Nxn                  |                      |                                 | Nodal                |                      |                                 |
| Nvl                  |                      |                                 | Nod2                 |                      |                                 |
| Nupr1l               |                      |                                 | Nnt                  |                      |                                 |
| Nup93                |                      |                                 | Nmur2                |                      |                                 |
| Nup54                |                      |                                 | Nmu                  |                      |                                 |
| Nup37                |                      |                                 | Nmt2                 |                      |                                 |
| Numbl                |                      |                                 | Nmnat2               |                      |                                 |
| Nuf2                 |                      |                                 | Nme8                 |                      |                                 |
| Nudt9                |                      |                                 | Nme2                 |                      |                                 |
| Nudt6                |                      |                                 | Nme1                 |                      |                                 |
| Nudt3                |                      |                                 | Nlrx1                |                      |                                 |
| Nudt21               |                      |                                 | Nln                  |                      |                                 |
| Nudt17               |                      |                                 | Nlk                  |                      |                                 |
| Nudt16l1             |                      |                                 | Nipsnap3b            |                      |                                 |
| Nudt1                |                      |                                 | Nif3l1               |                      |                                 |
| Nubp2                |                      |                                 | Niacr1               |                      |                                 |
| Nubp1                |                      |                                 | Nhp2                 |                      |                                 |
| Ntpcr                |                      |                                 | Nhej1                |                      |                                 |
| Nt5m                 |                      |                                 | Ngp                  |                      |                                 |
| Nt5dc1               |                      |                                 | Ngfr                 |                      |                                 |
| Nsun2                |                      |                                 | Nfya                 |                      |                                 |
| Nsf                  |                      |                                 | Nfil3                |                      |                                 |
| Nsd1                 |                      |                                 | Nfatc2               |                      |                                 |
| Ns5atp9              |                      |                                 | Nfatc1               |                      |                                 |
| Ns5atp4              |                      |                                 | Nf1                  |                      |                                 |
| Nrp2                 |                      |                                 | Neurog1              |                      |                                 |
| Nrg1                 |                      |                                 | Neurod1              |                      |                                 |
| Nrep                 |                      |                                 | Neurl2               |                      |                                 |
| Nrcam                |                      |                                 | Net1                 |                      |                                 |
| Nrbf2                |                      |                                 | Nepn                 |                      |                                 |
| Nrarp                |                      |                                 | Nenf                 |                      |                                 |
| Nr5a1                |                      |                                 | Nemf                 |                      |                                 |
| Nr4a2                |                      |                                 | Nek7                 |                      |                                 |
| Nr3c1                |                      |                                 | Nek6                 |                      |                                 |
| Nr1d1                |                      |                                 | Nek4                 |                      |                                 |
| Nptn                 |                      |                                 | Nek1                 |                      |                                 |
| Npepps               |                      |                                 | Nedd9                |                      |                                 |
| Npepo                |                      |                                 | Nedd4l               |                      |                                 |
| Npc1                 |                      |                                 | Nedd4                |                      |                                 |
| Notch4               |                      |                                 | Ndufv2               |                      |                                 |
| Nop58                |                      |                                 | Ndufs7               |                      |                                 |

| <u>Egr2-specific</u> | <u>Myrf-specific</u> | <u>Both</u><br><u>Egr2/Myrf</u> | <u>Egr2-specific</u> | <u>Myrf-specific</u> | <u>Both</u><br><u>Egr2/Myrf</u> |
|----------------------|----------------------|---------------------------------|----------------------|----------------------|---------------------------------|
| Ndufs2               |                      |                                 | Mxd1                 |                      |                                 |
| Ndufb4               |                      |                                 | Mvd                  |                      |                                 |
| Ndufa2               |                      |                                 | Murc                 |                      |                                 |
| Ndst2                |                      |                                 | Muc20                |                      |                                 |
| Ndrp1                |                      |                                 | Mtus2                |                      |                                 |
| Ndfip1               |                      |                                 | Mtss1l               |                      |                                 |
| Ncor1                |                      |                                 | Mtss1                |                      |                                 |
| Ncoa4                |                      |                                 | Mtnr1a               |                      |                                 |
| Nckipsd              |                      |                                 | Mtmer9               |                      |                                 |
| Nck1                 |                      |                                 | Mtmer4               |                      |                                 |
| Ncf2                 |                      |                                 | Mtmer3               |                      |                                 |
| Ncdn                 |                      |                                 | Mtmer1               |                      |                                 |
| Ncbp1                |                      |                                 | Mtm1                 |                      |                                 |
| Nav3                 |                      |                                 | Mtif2                |                      |                                 |
| Narf                 |                      |                                 | Mtf2                 |                      |                                 |
| Napg                 |                      |                                 | Mtf1                 |                      |                                 |
| Nampt                |                      |                                 | Mtbp                 |                      |                                 |
| Nagpa                |                      |                                 | Mt4                  |                      |                                 |
| Naf1                 |                      |                                 | Mt3                  |                      |                                 |
| Nadk                 |                      |                                 | Mt2A                 |                      |                                 |
| Nabp1                |                      |                                 | Msmo1                |                      |                                 |
| Nab2                 |                      |                                 | Msl1                 |                      |                                 |
| Nab1                 |                      |                                 | Msantd1              |                      |                                 |
| Naa35                |                      |                                 | Mrrf                 |                      |                                 |
| Naa25                |                      |                                 | Mrps9                |                      |                                 |
| N4bp2l2              |                      |                                 | Mrps7                |                      |                                 |
| N4bp2l1              |                      |                                 | Mrps31               |                      |                                 |
| Myt1                 |                      |                                 | Mrps23               |                      |                                 |
| Myrip                |                      |                                 | Mrps18c              |                      |                                 |
| Mypop                |                      |                                 | Mrpl55               |                      |                                 |
| Mypn                 |                      |                                 | Mrpl51               |                      |                                 |
| Myom1                |                      |                                 | Mrpl48               |                      |                                 |
| Myo9b                |                      |                                 | Mrpl45               |                      |                                 |
| Myo1e                |                      |                                 | Mrpl44               |                      |                                 |
| Myo1d                |                      |                                 | Mrpl36               |                      |                                 |
| Myo1b                |                      |                                 | Mrpl35               |                      |                                 |
| Myo19                |                      |                                 | Mrpl34               |                      |                                 |
| Mylip                |                      |                                 | Mrpl32               |                      |                                 |
| Myl6l                |                      |                                 | Mrpl20               |                      |                                 |
| Myl6b                |                      |                                 | Mrpl1                |                      |                                 |
| My12b                |                      |                                 | Mrgprx1              |                      |                                 |
| Myh9                 |                      |                                 | Mras                 |                      |                                 |
| Myh4                 |                      |                                 | Mpz1                 |                      |                                 |
| Myh14                |                      |                                 | Mpz                  |                      |                                 |
| Myc                  |                      |                                 | Mppe1                |                      |                                 |

| <u>Egr2-specific</u> | <u>Myrf-specific</u> | <u>Both</u><br><u>Egr2/Myrf</u> | <u>Egr2-specific</u> | <u>Myrf-specific</u> | <u>Both</u><br><u>Egr2/Myrf</u> |
|----------------------|----------------------|---------------------------------|----------------------|----------------------|---------------------------------|
| Mpp7                 |                      |                                 | Mir26b               |                      |                                 |
| Mpp6                 |                      |                                 | Mir26a               |                      |                                 |
| Mpp3                 |                      |                                 | Mir24-2              |                      |                                 |
| Mpc2                 |                      |                                 | Mir23b               |                      |                                 |
| Mospd3               |                      |                                 | Mir23a               |                      |                                 |
| Morn4                |                      |                                 | Mir224               |                      |                                 |
| Morf4l1              |                      |                                 | Mir217               |                      |                                 |
| Morc3                |                      |                                 | Mir216b              |                      |                                 |
| Morc1                |                      |                                 | Mir21                |                      |                                 |
| Mon2                 |                      |                                 | Mir181c              |                      |                                 |
| Mon1b                |                      |                                 | Mir181b2             |                      |                                 |
| Mok                  |                      |                                 | Mir152               |                      |                                 |
| Mogat1               |                      |                                 | Mir145               |                      |                                 |
| Mnt                  |                      |                                 | Mir138-1             |                      |                                 |
| Mmp2                 |                      |                                 | Mir125b1             |                      |                                 |
| Mmp16                |                      |                                 | Mink1                |                      |                                 |
| Mmp15                |                      |                                 | Miip                 |                      |                                 |
| Mmp14                |                      |                                 | Mief1                |                      |                                 |
| Mmgt2                |                      |                                 | Micalcl              |                      |                                 |
| Mme                  |                      |                                 | Mical1               |                      |                                 |
| Mmaa                 |                      |                                 | Mgl1                 |                      |                                 |
| Mlycd                |                      |                                 | MGC94207             |                      |                                 |
| Ml1t11               |                      |                                 | MGC94199             |                      |                                 |
| Mitf                 |                      |                                 | MGC125239            |                      |                                 |
| Mirlet7c-2           |                      |                                 | MGC116121            |                      |                                 |
| Mirlet7c-1           |                      |                                 | MGC112715            |                      |                                 |
| Mirlet7a1            |                      |                                 | Mgat4c               |                      |                                 |
| Mir874               |                      |                                 | Mgat4b               |                      |                                 |
| Mir664-1             |                      |                                 | Mgat3                |                      |                                 |
| Mir6326              |                      |                                 | Mgat1                |                      |                                 |
| Mir6323              |                      |                                 | Mfsd6                |                      |                                 |
| Mir6322              |                      |                                 | Mfsd2a               |                      |                                 |
| Mir6216              |                      |                                 | Mfap3l               |                      |                                 |
| Mir466d              |                      |                                 | Mfap2                |                      |                                 |
| Mir383               |                      |                                 | Mex3c                |                      |                                 |
| Mir3596b             |                      |                                 | Mettl9               |                      |                                 |
| Mir3582              |                      |                                 | Mettl4               |                      |                                 |
| Mir3567              |                      |                                 | Mettl21c             |                      |                                 |
| Mir34b               |                      |                                 | Mertk                |                      |                                 |
| Mir34a               |                      |                                 | Mepce                |                      |                                 |
| Mir328b              |                      |                                 | Megf9                |                      |                                 |
| Mir30c2              |                      |                                 | Megf10               |                      |                                 |
| Mir30a               |                      |                                 | Mef2bnb              |                      |                                 |
| Mir3074              |                      |                                 | Med8                 |                      |                                 |
| Mir3065              |                      |                                 | Med22                |                      |                                 |



| <u>Egr2-specific</u> | <u>Myrf-specific</u> | <u>Both</u><br><u>Egr2/Myrf</u> | <u>Egr2-specific</u> | <u>Myrf-specific</u> | <u>Both</u><br><u>Egr2/Myrf</u> |
|----------------------|----------------------|---------------------------------|----------------------|----------------------|---------------------------------|
| Med17                |                      |                                 | Lysmd3               |                      |                                 |
| Med15                |                      |                                 | Lym7                 |                      |                                 |
| Med13                |                      |                                 | Lyl1                 |                      |                                 |
| Mdh1b                |                      |                                 | Ly6i                 |                      |                                 |
| Mdc1                 |                      |                                 | Lurap1               |                      |                                 |
| Mcoln1               |                      |                                 | Lum                  |                      |                                 |
| Mcm6                 |                      |                                 | Ltb                  |                      |                                 |
| Mcm4                 |                      |                                 | Lsm4                 |                      |                                 |
| Mcm2                 |                      |                                 | Lsm3                 |                      |                                 |
| Mchr1                |                      |                                 | Lsm11                |                      |                                 |
| Mcart1               |                      |                                 | Lrrtm3               |                      |                                 |
| Mcam                 |                      |                                 | Lrrtm2               |                      |                                 |
| Mc4r                 |                      |                                 | Lrrn3                |                      |                                 |
| Mbnl2                |                      |                                 | Lrrcc1               |                      |                                 |
| Mblac2               |                      |                                 | Lrrc8e               |                      |                                 |
| Mblac1               |                      |                                 | Lrrc71               |                      |                                 |
| Mau2                 |                      |                                 | Lrrc58               |                      |                                 |
| Matr3                |                      |                                 | Lrrc4c               |                      |                                 |
| Mast3                |                      |                                 | Lrrc43               |                      |                                 |
| Marveld3             |                      |                                 | Lrrc20               |                      |                                 |
| Mar7                 |                      |                                 | Lrrc18               |                      |                                 |
| Mar1                 |                      |                                 | Lrrc16a              |                      |                                 |
| Mapt                 |                      |                                 | Lrp2bp               |                      |                                 |
| Mapkbp1              |                      |                                 | Lrig2                |                      |                                 |
| Mapk9                |                      |                                 | Lrcol1               |                      |                                 |
| Mapk8                |                      |                                 | Lpcat2b              |                      |                                 |
| Mapk14               |                      |                                 | Lonp2                |                      |                                 |
| Mapk1                |                      |                                 | Loh12cr1             |                      |                                 |
| Map7d1               |                      |                                 | LOC690911            |                      |                                 |
| Map3k6               |                      |                                 | LOC690806            |                      |                                 |
| Map3k2               |                      |                                 | LOC690326            |                      |                                 |
| Map2k7               |                      |                                 | LOC690206            |                      |                                 |
| Map2k4               |                      |                                 | LOC689986            |                      |                                 |
| Map2                 |                      |                                 | LOC689713            |                      |                                 |
| Manf                 |                      |                                 | LOC687565            |                      |                                 |
| Man2c1               |                      |                                 | LOC687399            |                      |                                 |
| Man2b1               |                      |                                 | LOC686031            |                      |                                 |
| Man1b1               |                      |                                 | LOC685722            |                      |                                 |
| Man1a1               |                      |                                 | LOC684871            |                      |                                 |
| Mall                 |                      |                                 | LOC683469            |                      |                                 |
| Mal                  |                      |                                 | LOC680039            |                      |                                 |
| Mak                  |                      |                                 | LOC679825            |                      |                                 |
| Mafk                 |                      |                                 | LOC502894            |                      |                                 |
| Maf                  |                      |                                 | LOC500827            |                      |                                 |
| Lyst                 |                      |                                 | LOC500567            |                      |                                 |

| <u>Egr2-specific</u> | <u>Myrf-specific</u> | <u>Both</u><br><u>Egr2/Myrf</u> | <u>Egr2-specific</u> | <u>Myrf-specific</u> | <u>Both</u><br><u>Egr2/Myrf</u> |
|----------------------|----------------------|---------------------------------|----------------------|----------------------|---------------------------------|
| LOC500354            |                      |                                 | Lias                 |                      |                                 |
| LOC499843            |                      |                                 | Lhfpl4               |                      |                                 |
| LOC499796            |                      |                                 | Lgi4                 |                      |                                 |
| LOC499407            |                      |                                 | Lgals3               |                      |                                 |
| LOC498933            |                      |                                 | Lfng                 |                      |                                 |
| LOC498705            |                      |                                 | Letmd1               |                      |                                 |
| LOC498276            |                      |                                 | Letm2                |                      |                                 |
| LOC498265            |                      |                                 | Leprot               |                      |                                 |
| LOC498231            |                      |                                 | Lepr                 |                      |                                 |
| LOC498155            |                      |                                 | Leo1                 |                      |                                 |
| LOC498154            |                      |                                 | Leng8                |                      |                                 |
| LOC497938            |                      |                                 | Lenep                |                      |                                 |
| LOC497934            |                      |                                 | Ldlr                 |                      |                                 |
| LOC365238            |                      |                                 | Ldhb                 |                      |                                 |
| LOC361346            |                      |                                 | Lcmt2                |                      |                                 |
| LOC317165            |                      |                                 | Lcmt1                |                      |                                 |
| LOC310926            |                      |                                 | Lasp1                |                      |                                 |
| LOC301165            |                      |                                 | Larp1b               |                      |                                 |
| LOC294154            |                      |                                 | Large                |                      |                                 |
| LOC288913            |                      |                                 | Laptm5               |                      |                                 |
| LOC257650            |                      |                                 | Lap3                 |                      |                                 |
| LOC100912292         |                      |                                 | Lao1                 |                      |                                 |
| LOC100910802         |                      |                                 | Lamtor5              |                      |                                 |
| LOC100910318         |                      |                                 | Lamtor4              |                      |                                 |
| LOC100365935         |                      |                                 | l7Rn6                |                      |                                 |
| LOC100363294         |                      |                                 | Ksr1                 |                      |                                 |
| LOC100363289         |                      |                                 | Krt33a               |                      |                                 |
| LOC100362783         |                      |                                 | Krr1                 |                      |                                 |
| LOC100362172         |                      |                                 | Kremen1              |                      |                                 |
| LOC100361645         |                      |                                 | Kpnb1                |                      |                                 |
| LOC100359977         |                      |                                 | Kpna3                |                      |                                 |
| LOC100359968         |                      |                                 | Kntc1                |                      |                                 |
| LOC100151767         |                      |                                 | Klrb1b               |                      |                                 |
| LOC100125368         |                      |                                 | Klra5                |                      |                                 |
| LOC100125367         |                      |                                 | Klra17               |                      |                                 |
| Lnx2                 |                      |                                 | Klkb1                |                      |                                 |
| Lmtk2                |                      |                                 | Klk1c3               |                      |                                 |
| Lmo7                 |                      |                                 | Klhl9                |                      |                                 |
| Lmna                 |                      |                                 | Klhl26               |                      |                                 |
| Lmln                 |                      |                                 | Klhl25               |                      |                                 |
| Lmbrd1               |                      |                                 | Klhl21               |                      |                                 |
| Lman2l               |                      |                                 | Klhl11               |                      |                                 |
| Lipc                 |                      |                                 | Klhdc10              |                      |                                 |
| Limk1                |                      |                                 | Klf6                 |                      |                                 |
| Lig4                 |                      |                                 | Klf15                |                      |                                 |

| <u>Egr2-specific</u> | <u>Myrf-specific</u> | <u>Both</u><br><u>Egr2/Myrf</u> | <u>Egr2-specific</u> | <u>Myrf-specific</u> | <u>Both</u><br><u>Egr2/Myrf</u> |
|----------------------|----------------------|---------------------------------|----------------------|----------------------|---------------------------------|
| Klf11                |                      |                                 | lws1                 |                      |                                 |
| Kifc1                |                      |                                 | ltsn1                |                      |                                 |
| Kif5b                |                      |                                 | ltpripl2             |                      |                                 |
| Kif3c                |                      |                                 | ltpr3                |                      |                                 |
| Kif2c                |                      |                                 | ltpkb                |                      |                                 |
| Kif27                |                      |                                 | ltgb8                |                      |                                 |
| Kif19                |                      |                                 | ltgb5                |                      |                                 |
| Khdrbs2              |                      |                                 | ltgb4                |                      |                                 |
| Kdsr                 |                      |                                 | ltgb1                |                      |                                 |
| Kdm6b                |                      |                                 | lscu                 |                      |                                 |
| Kdm5b                |                      |                                 | lrs3                 |                      |                                 |
| Kdm2b                |                      |                                 | lrgm                 |                      |                                 |
| Kdm2a                |                      |                                 | lrgc                 |                      |                                 |
| Kdm1a                |                      |                                 | lrg1                 |                      |                                 |
| Kdelr2               |                      |                                 | lreb2                |                      |                                 |
| Kctd7                |                      |                                 | lqub                 |                      |                                 |
| Kctd18               |                      |                                 | lpo9                 |                      |                                 |
| Kctd11               |                      |                                 | lpmk                 |                      |                                 |
| Kctd1                |                      |                                 | ints2                |                      |                                 |
| Kcnrg                |                      |                                 | lnc                  |                      |                                 |
| Kcnq5                |                      |                                 | lnpp5k               |                      |                                 |
| Kcnmb4               |                      |                                 | lnpp5f               |                      |                                 |
| Kcnk5                |                      |                                 | lnpp4b               |                      |                                 |
| Kcnk1                |                      |                                 | lnpp4a               |                      |                                 |
| Kcnj11               |                      |                                 | lno80d               |                      |                                 |
| Kcnj10               |                      |                                 | lnmt                 |                      |                                 |
| Kcnh8                |                      |                                 | lng1                 |                      |                                 |
| Kcnh7                |                      |                                 | lnca1                |                      |                                 |
| Kcnh4                |                      |                                 | lmpdh2               |                      |                                 |
| Kcne4                |                      |                                 | lmp4                 |                      |                                 |
| Kcna10               |                      |                                 | llf3                 |                      |                                 |
| Kbtbd2               |                      |                                 | ll34                 |                      |                                 |
| Katnb1               |                      |                                 | ll3                  |                      |                                 |
| Kat7                 |                      |                                 | ll20rb               |                      |                                 |
| Kat6a                |                      |                                 | ll17rd               |                      |                                 |
| Kansl3               |                      |                                 | ll17ra               |                      |                                 |
| Kansl2               |                      |                                 | ll17f                |                      |                                 |
| Kank4                |                      |                                 | ll16                 |                      |                                 |
| Kank1                |                      |                                 | ll12rb2              |                      |                                 |
| Kalrn                |                      |                                 | lkzf5                |                      |                                 |
| Jund                 |                      |                                 | lkbke                |                      |                                 |
| Junb                 |                      |                                 | lkbkap               |                      |                                 |
| Jmjd7                |                      |                                 | lgsf8                |                      |                                 |
| Jmjd1c               |                      |                                 | lgfbp6               |                      |                                 |
| Jam3                 |                      |                                 | lgfbp5               |                      |                                 |

| <u>Egr2-specific</u> | <u>Myrf-specific</u> | <u>Both</u><br><u>Egr2/Myrf</u> | <u>Egr2-specific</u> | <u>Myrf-specific</u> | <u>Both</u><br><u>Egr2/Myrf</u> |
|----------------------|----------------------|---------------------------------|----------------------|----------------------|---------------------------------|
| Igf2r                |                      |                                 | Hnrpd                |                      |                                 |
| Ift81                |                      |                                 | Hnrnpl               |                      |                                 |
| Ift74                |                      |                                 | Hnrnpk               |                      |                                 |
| Ift20                |                      |                                 | Hnrnph3              |                      |                                 |
| Ifnk                 |                      |                                 | Hnrnpf               |                      |                                 |
| Ier5l                |                      |                                 | Hnrnpdl              |                      |                                 |
| Ier5                 |                      |                                 | Hnf1a                |                      |                                 |
| Ier3                 |                      |                                 | Hmox1                |                      |                                 |
| Ier2                 |                      |                                 | Hmgn2                |                      |                                 |
| Idi1                 |                      |                                 | Hmgcr                |                      |                                 |
| Id4                  |                      |                                 | Hmgb2                |                      |                                 |
| Ica1l                |                      |                                 | Hmgb1-ps2            |                      |                                 |
| Iba57                |                      |                                 | Hk3                  |                      |                                 |
| Hus1                 |                      |                                 | Hjurp                |                      |                                 |
| Htt                  |                      |                                 | Hist3h2bb            |                      |                                 |
| Htra2                |                      |                                 | Hist2h3c2            |                      |                                 |
| Htr1f                |                      |                                 | Hist2h2ab            |                      |                                 |
| Htr1b                |                      |                                 | Hist1h4m             |                      |                                 |
| Hspe1                |                      |                                 | Hist1h4b             |                      |                                 |
| Hspb11               |                      |                                 | Hist1h2bo            |                      |                                 |
| Hspb1                |                      |                                 | Hist1h2bh            |                      |                                 |
| Hspa9                |                      |                                 | Hist1h2ail           |                      |                                 |
| Hspa5                |                      |                                 | Hist1h2af            |                      |                                 |
| Hspa4                |                      |                                 | Hist1h1t             |                      |                                 |
| Hspa2                |                      |                                 | Hist1h1d             |                      |                                 |
| Hspa13               |                      |                                 | Hipk4                |                      |                                 |
| Hsp90ab1             |                      |                                 | Hipk3                |                      |                                 |
| Hsf2bp               |                      |                                 | Hip1r                |                      |                                 |
| Hsf2                 |                      |                                 | Hils1                |                      |                                 |
| Hsd17b8              |                      |                                 | Higd2a               |                      |                                 |
| Hsd17b3              |                      |                                 | Hibadh               |                      |                                 |
| Hsd17b12             |                      |                                 | Hfe2                 |                      |                                 |
| Hsd17b11             |                      |                                 | Hfe                  |                      |                                 |
| Hscb                 |                      |                                 | Hexim2               |                      |                                 |
| Hs6st1               |                      |                                 | Hexim1               |                      |                                 |
| Hs3st5               |                      |                                 | Hes7                 |                      |                                 |
| Hs3st3a1             |                      |                                 | Hes1                 |                      |                                 |
| Hrh2                 |                      |                                 | Herc4                |                      |                                 |
| Hps5                 |                      |                                 | Hecw2                |                      |                                 |
| Hpgd                 |                      |                                 | Hecw1                |                      |                                 |
| Hpd                  |                      |                                 | Heatr2               |                      |                                 |
| Hoxd3                |                      |                                 | Hdlbp                |                      |                                 |
| Hoxd1                |                      |                                 | Hdhd2                |                      |                                 |
| Hook3                |                      |                                 | Hdgf                 |                      |                                 |
| Hook2                |                      |                                 | Hddc3                |                      |                                 |

| <u>Egr2-specific</u> | <u>Myrf-specific</u> | <u>Both</u><br><u>Egr2/Myrf</u> | <u>Egr2-specific</u> | <u>Myrf-specific</u> | <u>Both</u><br><u>Egr2/Myrf</u> |
|----------------------|----------------------|---------------------------------|----------------------|----------------------|---------------------------------|
| Hddc2                |                      |                                 | Grn                  |                      |                                 |
| Hdac4                |                      |                                 | Grifin               |                      |                                 |
| Hdac2                |                      |                                 | Grcc10               |                      |                                 |
| Hdac1                |                      |                                 | Grap                 |                      |                                 |
| Hcrtr2               |                      |                                 | Gpx5                 |                      |                                 |
| Hcn3                 |                      |                                 | Gpsm1                |                      |                                 |
| Hcn1                 |                      |                                 | Gpr87                |                      |                                 |
| Hbegf                |                      |                                 | Gpr6                 |                      |                                 |
| Haus8                |                      |                                 | Gpr3711              |                      |                                 |
| Haus3                |                      |                                 | Gpr158               |                      |                                 |
| Has3                 |                      |                                 | Gpr157               |                      |                                 |
| Hapln4               |                      |                                 | Gpr155               |                      |                                 |
| Hand1                |                      |                                 | Gpr137b              |                      |                                 |
| Hagh                 |                      |                                 | Gpr135               |                      |                                 |
| Hadha                |                      |                                 | Gpr107               |                      |                                 |
| H6pd                 |                      |                                 | Gpn2                 |                      |                                 |
| H2afy2               |                      |                                 | Gphn                 |                      |                                 |
| H2afx                |                      |                                 | Gpd1l                |                      |                                 |
| H2afj                |                      |                                 | Got1l1               |                      |                                 |
| Gypc                 |                      |                                 | Gnpda2               |                      |                                 |
| Guk1                 |                      |                                 | Gng5                 |                      |                                 |
| Gtpbp8               |                      |                                 | Gne                  |                      |                                 |
| Gtpbp6               |                      |                                 | Gnao1                |                      |                                 |
| Gtpbp3               |                      |                                 | Gnal                 |                      |                                 |
| Gtpbp2               |                      |                                 | Gnai3                |                      |                                 |
| Gtf3c6               |                      |                                 | Gnai1                |                      |                                 |
| Gtf3c3               |                      |                                 | Gna12                |                      |                                 |
| Gtf2ird2             |                      |                                 | Gna11                |                      |                                 |
| Gtf2ird1             |                      |                                 | Gmfb                 |                      |                                 |
| Gtf2i                |                      |                                 | Glyr1                |                      |                                 |
| Gtf2h4               |                      |                                 | Glud1                |                      |                                 |
| Gtf2h3               |                      |                                 | Gltscr2              |                      |                                 |
| Gtf2f2               |                      |                                 | Gltscr1l             |                      |                                 |
| Gtf2e1               |                      |                                 | Gltscr1              |                      |                                 |
| Gtf2a1l              |                      |                                 | Gls                  |                      |                                 |
| Gtdc1                |                      |                                 | Glrx3                |                      |                                 |
| Gsx1                 |                      |                                 | Glg1                 |                      |                                 |
| Gstt4                |                      |                                 | Gldn                 |                      |                                 |
| Gstt3                |                      |                                 | Gjd4                 |                      |                                 |
| Gstt2                |                      |                                 | Git2                 |                      |                                 |
| Gstm4                |                      |                                 | Git1                 |                      |                                 |
| Gsta4                |                      |                                 | Gipc1                |                      |                                 |
| Gsta1                |                      |                                 | Gins1                |                      |                                 |
| Gsr                  |                      |                                 | Ggps1                |                      |                                 |
| Gsk3b                |                      |                                 | Ggnbp2               |                      |                                 |

| <u>Egr2-specific</u> | <u>Myrf-specific</u> | <u>Both</u><br><u>Egr2/Myrf</u> | <u>Egr2-specific</u> | <u>Myrf-specific</u> | <u>Both</u><br><u>Egr2/Myrf</u> |
|----------------------|----------------------|---------------------------------|----------------------|----------------------|---------------------------------|
| Gfpt1                |                      |                                 | Frmd8                |                      |                                 |
| Gfm2                 |                      |                                 | Frmd6                |                      |                                 |
| Gdpd1                |                      |                                 | Frmd3                |                      |                                 |
| Gdf9                 |                      |                                 | Fra10ac1             |                      |                                 |
| Gdf7                 |                      |                                 | Foxp3                |                      |                                 |
| Gdf15                |                      |                                 | Foxj2                |                      |                                 |
| Gcs1                 |                      |                                 | Foxe3                |                      |                                 |
| Gcnt2                |                      |                                 | Foxa1                |                      |                                 |
| Gclc                 |                      |                                 | Fopnl                |                      |                                 |
| Gcc2                 |                      |                                 | Fntb                 |                      |                                 |
| Gbe1                 |                      |                                 | Fnta                 |                      |                                 |
| Gbas                 |                      |                                 | Fnip2                |                      |                                 |
| Gba3                 |                      |                                 | Fnip1                |                      |                                 |
| Gatsl2               |                      |                                 | Fnbp4                |                      |                                 |
| Gatad2a              |                      |                                 | Fmnl1                |                      |                                 |
| Gata1                |                      |                                 | Fkbp1                |                      |                                 |
| Gas5                 |                      |                                 | Fkbp9                |                      |                                 |
| Gap43                |                      |                                 | Fkbp5                |                      |                                 |
| Gan                  |                      |                                 | Fkbp1a               |                      |                                 |
| Galr1                |                      |                                 | Fjx1                 |                      |                                 |
| Galnt7               |                      |                                 | Fitm2                |                      |                                 |
| Galnt1               |                      |                                 | Figl1                |                      |                                 |
| Gal3st1              |                      |                                 | Fign                 |                      |                                 |
| Gak                  |                      |                                 | Fibp                 |                      |                                 |
| Gabrg2               |                      |                                 | Fhl5                 |                      |                                 |
| Gabpb1               |                      |                                 | Fhl2                 |                      |                                 |
| Gabbr1               |                      |                                 | Fgfr4                |                      |                                 |
| Gabarap              |                      |                                 | Fgf7                 |                      |                                 |
| Gab1                 |                      |                                 | Fgf3                 |                      |                                 |
| G3bp2                |                      |                                 | Fgd3                 |                      |                                 |
| Fzr1                 |                      |                                 | Fez2                 |                      |                                 |
| Fyn                  |                      |                                 | Fem1c                |                      |                                 |
| Fyco1                |                      |                                 | Fdxr                 |                      |                                 |
| Fxyd3                |                      |                                 | Fchsd1               |                      |                                 |
| Fxyd2                |                      |                                 | Fcgr2a               |                      |                                 |
| Fus                  |                      |                                 | Fbxw8                |                      |                                 |
| Fundc2               |                      |                                 | Fbxo7                |                      |                                 |
| Fundc1               |                      |                                 | Fbxo46               |                      |                                 |
| Fubp3                |                      |                                 | Fbxo28               |                      |                                 |
| Ftmt                 |                      |                                 | Fbxo22               |                      |                                 |
| Ftl1                 |                      |                                 | Fbxo21               |                      |                                 |
| Fth1                 |                      |                                 | Fbxo2                |                      |                                 |
| Fst                  |                      |                                 | Fbxo18               |                      |                                 |
| Fry                  |                      |                                 | Fbxl4                |                      |                                 |
| Frs3                 |                      |                                 | Fbxl22               |                      |                                 |

| <u>Egr2-specific</u> | <u>Myrf-specific</u> | <u>Both</u><br><u>Egr2/Myrf</u> | <u>Egr2-specific</u> | <u>Myrf-specific</u> | <u>Both</u><br><u>Egr2/Myrf</u> |
|----------------------|----------------------|---------------------------------|----------------------|----------------------|---------------------------------|
| Fbxl20               |                      |                                 | Fahd1                |                      |                                 |
| Fbxl12               |                      |                                 | Faf2                 |                      |                                 |
| Fbn2                 |                      |                                 | Faf1                 |                      |                                 |
| Fbln5                |                      |                                 | F8                   |                      |                                 |
| Fblim1               |                      |                                 | F11                  |                      |                                 |
| Farsa                |                      |                                 | Ezr                  |                      |                                 |
| Far1                 |                      |                                 | Ezh2                 |                      |                                 |
| Fance                |                      |                                 | Exosc9               |                      |                                 |
| Fancc                |                      |                                 | Exosc7               |                      |                                 |
| Fam96b               |                      |                                 | Exoc8                |                      |                                 |
| Fam91a1              |                      |                                 | Exoc7                |                      |                                 |
| Fam89b               |                      |                                 | Ewsr1                |                      |                                 |
| Fam83h               |                      |                                 | Evi5                 |                      |                                 |
| Fam83b               |                      |                                 | Eva1b                |                      |                                 |
| Fam81a               |                      |                                 | Etv4                 |                      |                                 |
| Fam76a               |                      |                                 | Etnk2                |                      |                                 |
| Fam72a               |                      |                                 | Erp29                |                      |                                 |
| Fam71a               |                      |                                 | Erlec1               |                      |                                 |
| Fam65b               |                      |                                 | Erc2                 |                      |                                 |
| Fam58b               |                      |                                 | Erbp4                |                      |                                 |
| Fam53a               |                      |                                 | Erbp2                |                      |                                 |
| Fam49b               |                      |                                 | Eral1                |                      |                                 |
| Fam43a               |                      |                                 | Eps15l1              |                      |                                 |
| Fam3d                |                      |                                 | Eps15                |                      |                                 |
| Fam229b              |                      |                                 | Epo                  |                      |                                 |
| Fam222a              |                      |                                 | Ephb3                |                      |                                 |
| Fam220a              |                      |                                 | Ephb1                |                      |                                 |
| Fam212b              |                      |                                 | Epha5                |                      |                                 |
| Fam20c               |                      |                                 | Epha3                |                      |                                 |
| Fam189b              |                      |                                 | Epdr1                |                      |                                 |
| Fam188a              |                      |                                 | Epb42                |                      |                                 |
| Fam180a              |                      |                                 | Epb41l4a             |                      |                                 |
| Fam173a              |                      |                                 | Epb41l3              |                      |                                 |
| Fam168b              |                      |                                 | Epb4.1l5             |                      |                                 |
| Fam163b              |                      |                                 | Epas1                |                      |                                 |
| Fam13b               |                      |                                 | Eny2                 |                      |                                 |
| Fam13a               |                      |                                 | Enpp6                |                      |                                 |
| Fam133b              |                      |                                 | Enpp1                |                      |                                 |
| Fam129c              |                      |                                 | Enoph1               |                      |                                 |
| Fam126b              |                      |                                 | Enc1                 |                      |                                 |
| Fam117b              |                      |                                 | Enam                 |                      |                                 |
| Fam110b              |                      |                                 | Eml1                 |                      |                                 |
| Fam109b              |                      |                                 | Emid1                |                      |                                 |
| Fam105a              |                      |                                 | Emc8                 |                      |                                 |
| Fam101a              |                      |                                 | Elovl7               |                      |                                 |

| <u>Egr2-specific</u> | <u>Myrf-specific</u> | <u>Both</u><br><u>Egr2/Myrf</u> | <u>Egr2-specific</u> | <u>Myrf-specific</u> | <u>Both</u><br><u>Egr2/Myrf</u> |
|----------------------|----------------------|---------------------------------|----------------------|----------------------|---------------------------------|
| Elov15               |                      |                                 | Dusp14               |                      |                                 |
| Elof1                |                      |                                 | Dtwd2                |                      |                                 |
| Eln                  |                      |                                 | Dsg4                 |                      |                                 |
| Elmod3               |                      |                                 | Dse                  |                      |                                 |
| Elmo2                |                      |                                 | Dscr3                |                      |                                 |
| Ell                  |                      |                                 | Drp2                 |                      |                                 |
| Elk3                 |                      |                                 | Drg1                 |                      |                                 |
| Elfn1                |                      |                                 | Drap1                |                      |                                 |
| Elf1                 |                      |                                 | Dpysl3               |                      |                                 |
| Eif5b                |                      |                                 | Dpysl2               |                      |                                 |
| Eif5a                |                      |                                 | Dpagt1               |                      |                                 |
| Eif4g3               |                      |                                 | Dot1l                |                      |                                 |
| Eif4a1               |                      |                                 | Dopey2               |                      |                                 |
| Eif3j                |                      |                                 | Donson               |                      |                                 |
| Eif3c                |                      |                                 | Dok6                 |                      |                                 |
| Eif2b3               |                      |                                 | Dok4                 |                      |                                 |
| Eif2b1               |                      |                                 | Dock9                |                      |                                 |
| Eif1a                |                      |                                 | Dock6                |                      |                                 |
| Eif1                 |                      |                                 | Dnpep                |                      |                                 |
| Eid1                 |                      |                                 | Dnmt3l               |                      |                                 |
| Ehhadh               |                      |                                 | Dnmt1                |                      |                                 |
| Egr2                 |                      |                                 | Dnase1l3             |                      |                                 |
| Egr1                 |                      |                                 | Dnase1               |                      |                                 |
| Egfl8                |                      |                                 | Dnal4                |                      |                                 |
| Efs                  |                      |                                 | Dnajc7               |                      |                                 |
| Efnb2                |                      |                                 | Dnajc12              |                      |                                 |
| Efhd1                |                      |                                 | Dnajb11              |                      |                                 |
| Eepd1                |                      |                                 | Dnaja1               |                      |                                 |
| Eef1g                |                      |                                 | Dmtn                 |                      |                                 |
| Eef1a1               |                      |                                 | Dll3                 |                      |                                 |
| Edc4                 |                      |                                 | Dlg4                 |                      |                                 |
| Edar                 |                      |                                 | Dld                  |                      |                                 |
| Eci2                 |                      |                                 | Dlc1                 |                      |                                 |
| Eci1                 |                      |                                 | Disp2                |                      |                                 |
| Ebf1                 |                      |                                 | Disp1                |                      |                                 |
| Ears2                |                      |                                 | Disc1                |                      |                                 |
| Eapp                 |                      |                                 | Dis3l2               |                      |                                 |
| Dynlt1               |                      |                                 | Dip2c                |                      |                                 |
| Dynll1               |                      |                                 | Diaph1               |                      |                                 |
| Dync2li1             |                      |                                 | Diablo               |                      |                                 |
| Dydc2                |                      |                                 | Dhx40                |                      |                                 |
| Dvl2                 |                      |                                 | Dhx38                |                      |                                 |
| Dusp6                |                      |                                 | Dhx15                |                      |                                 |
| Dusp4                |                      |                                 | Dhtkd1               |                      |                                 |
| Dusp18               |                      |                                 | Dhrsx                |                      |                                 |



| <u>Egr2-specific</u> | <u>Myrf-specific</u> | <u>Both</u><br><u>Egr2/Myrf</u> | <u>Egr2-specific</u> | <u>Myrf-specific</u> | <u>Both</u><br><u>Egr2/Myrf</u> |
|----------------------|----------------------|---------------------------------|----------------------|----------------------|---------------------------------|
| Dhh                  |                      |                                 | Cyp2j10              |                      |                                 |
| Dguok                |                      |                                 | Cyp27a1              |                      |                                 |
| Dgke                 |                      |                                 | Cyp19a1              |                      |                                 |
| Dgcr6                |                      |                                 | Cyb5r3               |                      |                                 |
| Derl3                |                      |                                 | Cyb561               |                      |                                 |
| Derl1                |                      |                                 | Cxcr7                |                      |                                 |
| Depdc5               |                      |                                 | Cxcl3                |                      |                                 |
| Dennd1a              |                      |                                 | Cxcl17               |                      |                                 |
| Defb39               |                      |                                 | Cxcl11               |                      |                                 |
| Defb23               |                      |                                 | Cwh43                |                      |                                 |
| Defa11               |                      |                                 | Cul5                 |                      |                                 |
| Def8                 |                      |                                 | Cul3                 |                      |                                 |
| Deaf1                |                      |                                 | Cuedc1               |                      |                                 |
| Ddx52                |                      |                                 | Ctxn3                |                      |                                 |
| Ddx50                |                      |                                 | Cttnbp2nl            |                      |                                 |
| Ddx46                |                      |                                 | Ctss                 |                      |                                 |
| Ddx41                |                      |                                 | Ctsl1                |                      |                                 |
| Ddx39a               |                      |                                 | Ctrl                 |                      |                                 |
| Ddx21                |                      |                                 | Ctrb1                |                      |                                 |
| Ddx20                |                      |                                 | Ctnnb1               |                      |                                 |
| Ddn                  |                      |                                 | Ctif                 |                      |                                 |
| Ddit4                |                      |                                 | Ctdsp1               |                      |                                 |
| Ddc8                 |                      |                                 | Ctcf                 |                      |                                 |
| Dctn4                |                      |                                 | Ctc1                 |                      |                                 |
| Dctn1                |                      |                                 | Cstf3                |                      |                                 |
| Dcp1a                |                      |                                 | Cstb                 |                      |                                 |
| Dck                  |                      |                                 | Csta                 |                      |                                 |
| Dcdc2                |                      |                                 | Csrp2bp              |                      |                                 |
| Dcbld2               |                      |                                 | Cspg4                |                      |                                 |
| Dcaf11               |                      |                                 | Csnk2a2              |                      |                                 |
| Daxx                 |                      |                                 | Csnk1g2              |                      |                                 |
| Dao                  |                      |                                 | Csnk1e               |                      |                                 |
| Dalrd3               |                      |                                 | Csnk1a1              |                      |                                 |
| Daglb                |                      |                                 | Csn1s1               |                      |                                 |
| Dag1                 |                      |                                 | Csmd1                |                      |                                 |
| Dad1                 |                      |                                 | Csf2                 |                      |                                 |
| Cyth3                |                      |                                 | Csf1r                |                      |                                 |
| Cysltr2              |                      |                                 | Csde1                |                      |                                 |
| Cyp4x1               |                      |                                 | Cryz1                |                      |                                 |
| Cyp4f17              |                      |                                 | Crygn                |                      |                                 |
| Cyp46a1              |                      |                                 | Cryge                |                      |                                 |
| Cyp3a9               |                      |                                 | Cryba1               |                      |                                 |
| Cyp39a1              |                      |                                 | Cryab                |                      |                                 |
| Cyp2r1               |                      |                                 | Cry2                 |                      |                                 |
| Cyp2j3               |                      |                                 | Crtap                |                      |                                 |

| <u>Egr2-specific</u> | <u>Myrf-specific</u> | <u>Both</u><br><u>Egr2/Myrf</u> | <u>Egr2-specific</u> | <u>Myrf-specific</u> | <u>Both</u><br><u>Egr2/Myrf</u> |
|----------------------|----------------------|---------------------------------|----------------------|----------------------|---------------------------------|
| Crot                 |                      |                                 | Coa5                 |                      |                                 |
| Crocc                |                      |                                 | Cntnap4              |                      |                                 |
| Crls1                |                      |                                 | Cntn3                |                      |                                 |
| Crlf2                |                      |                                 | Cntf                 |                      |                                 |
| Crispld1             |                      |                                 | Cnp                  |                      |                                 |
| Crisp1               |                      |                                 | Cnot7                |                      |                                 |
| Crip2                |                      |                                 | Cnot2                |                      |                                 |
| Crip1                |                      |                                 | Cnot11               |                      |                                 |
| Crhr1                |                      |                                 | Cnot1                |                      |                                 |
| Crem                 |                      |                                 | Cnih4                |                      |                                 |
| Crebrf               |                      |                                 | Cnep1r1              |                      |                                 |
| Crebl2               |                      |                                 | Cnbp                 |                      |                                 |
| Creb3l2              |                      |                                 | Cmtr1                |                      |                                 |
| Crcp                 |                      |                                 | Cmtm3                |                      |                                 |
| Cradd                |                      |                                 | Cmss1                |                      |                                 |
| Cpn2                 |                      |                                 | Cmklr1               |                      |                                 |
| Cpd                  |                      |                                 | Cmb1                 |                      |                                 |
| Cpamd8               |                      |                                 | Clybl                |                      |                                 |
| Cox6c                |                      |                                 | Clvs1                |                      |                                 |
| Cox4i2               |                      |                                 | Cltc                 |                      |                                 |
| Cox19                |                      |                                 | Clstn1               |                      |                                 |
| Cox18                |                      |                                 | Clrn3                |                      |                                 |
| Cotl1                |                      |                                 | Clpx                 |                      |                                 |
| Coro6                |                      |                                 | Clock                |                      |                                 |
| Corin                |                      |                                 | Cln8                 |                      |                                 |
| Coq5                 |                      |                                 | Cln6                 |                      |                                 |
| Coq3                 |                      |                                 | Clk1                 |                      |                                 |
| Cops8                |                      |                                 | Clic6                |                      |                                 |
| Cops7b               |                      |                                 | Clec7a               |                      |                                 |
| Cops6                |                      |                                 | Clec3a               |                      |                                 |
| Cops2                |                      |                                 | Clec2g               |                      |                                 |
| Comt                 |                      |                                 | Clec2dl1             |                      |                                 |
| Commd3               |                      |                                 | Cldnd1               |                      |                                 |
| Commd10              |                      |                                 | Cldn4                |                      |                                 |
| Commd1               |                      |                                 | Cldn24               |                      |                                 |
| Colec10              |                      |                                 | Cldn22               |                      |                                 |
| Col6a2               |                      |                                 | Cldn19               |                      |                                 |
| Col5a2               |                      |                                 | Cldn18               |                      |                                 |
| Col5a1               |                      |                                 | Cldn16               |                      |                                 |
| Col3a1               |                      |                                 | Cldn12               |                      |                                 |
| Col1a2               |                      |                                 | Clcn3                |                      |                                 |
| Col1a1               |                      |                                 | Cks2                 |                      |                                 |
| Col14a1              |                      |                                 | Cks1b                |                      |                                 |
| Coil                 |                      |                                 | Ckb                  |                      |                                 |
| Cog4                 |                      |                                 | Cirbp                |                      |                                 |

| <u>Egr2-specific</u> | <u>Myrf-specific</u> | <u>Both</u><br><u>Egr2/Myrf</u> | <u>Egr2-specific</u> | <u>Myrf-specific</u> | <u>Both</u><br><u>Egr2/Myrf</u> |
|----------------------|----------------------|---------------------------------|----------------------|----------------------|---------------------------------|
| Cilp                 |                      |                                 | Cdc42ep4             |                      |                                 |
| Cic                  |                      |                                 | Cdc42ep2             |                      |                                 |
| Chtf8                |                      |                                 | Cdc42ep1             |                      |                                 |
| Chrn4                |                      |                                 | Cdc42bpb             |                      |                                 |
| Chrn3                |                      |                                 | Cdc42bpa             |                      |                                 |
| Chrna9               |                      |                                 | Cdc42                |                      |                                 |
| Chpt1                |                      |                                 | Cdc27                |                      |                                 |
| Chpf                 |                      |                                 | Cdc14b               |                      |                                 |
| Chordc1              |                      |                                 | Cdc14a               |                      |                                 |
| Chn2                 |                      |                                 | Cdad1                |                      |                                 |
| Chmp2a               |                      |                                 | Cd97                 |                      |                                 |
| Chmp1b               |                      |                                 | Cd81                 |                      |                                 |
| Chka                 |                      |                                 | Cd74                 |                      |                                 |
| Chfr                 |                      |                                 | Cd34                 |                      |                                 |
| Chek2                |                      |                                 | Cd320                |                      |                                 |
| Chdh                 |                      |                                 | Cd300lf              |                      |                                 |
| Chd6                 |                      |                                 | Cd300lb              |                      |                                 |
| Chd5                 |                      |                                 | Cd2ap                |                      |                                 |
| Chd2                 |                      |                                 | Cd276                |                      |                                 |
| Cggbp1               |                      |                                 | Cd244                |                      |                                 |
| Cflar                |                      |                                 | Cd164                |                      |                                 |
| Cfdp1                |                      |                                 | Cct8                 |                      |                                 |
| Cetn3                |                      |                                 | Cct6a                |                      |                                 |
| Cep95                |                      |                                 | Cct4                 |                      |                                 |
| Cep63                |                      |                                 | Ccr7                 |                      |                                 |
| Cep5711              |                      |                                 | Ccn11                |                      |                                 |
| Cep120               |                      |                                 | Ccng2                |                      |                                 |
| Cep112               |                      |                                 | Ccl4                 |                      |                                 |
| Cenpu                |                      |                                 | Ccl26                |                      |                                 |
| Celf1                |                      |                                 | Ccl2                 |                      |                                 |
| Cebpb                |                      |                                 | Ccdc97               |                      |                                 |
| Cdv3                 |                      |                                 | Ccdc92               |                      |                                 |
| Cdkn2aip             |                      |                                 | Ccdc80               |                      |                                 |
| Cdkn1b               |                      |                                 | Ccdc69               |                      |                                 |
| Cdkn1a               |                      |                                 | Ccdc68               |                      |                                 |
| Cdk13                |                      |                                 | Ccdc63               |                      |                                 |
| Cdk10                |                      |                                 | Ccdc62               |                      |                                 |
| Cdk1                 |                      |                                 | Ccdc51               |                      |                                 |
| Cdh6                 |                      |                                 | Ccdc41               |                      |                                 |
| Cdh2                 |                      |                                 | Ccdc181              |                      |                                 |
| Cdh11                |                      |                                 | Ccdc173              |                      |                                 |
| Cdh1                 |                      |                                 | Ccdc17               |                      |                                 |
| Cdca2                |                      |                                 | Ccdc169              |                      |                                 |
| Cdc5l                |                      |                                 | Ccdc153              |                      |                                 |
| Cdc42se2             |                      |                                 | Ccdc112              |                      |                                 |

| <u>Egr2-specific</u> | <u>Myrf-specific</u> | <u>Both</u><br><u>Egr2/Myrf</u> | <u>Egr2-specific</u> | <u>Myrf-specific</u> | <u>Both</u><br><u>Egr2/Myrf</u> |
|----------------------|----------------------|---------------------------------|----------------------|----------------------|---------------------------------|
| Ccdc104              |                      |                                 | Btbd9                |                      |                                 |
| Cbln1                |                      |                                 | Bsn                  |                      |                                 |
| Cblb                 |                      |                                 | Brinp1               |                      |                                 |
| Cbfa2t3              |                      |                                 | Bri3                 |                      |                                 |
| Casq1                |                      |                                 | Brf2                 |                      |                                 |
| Casp8ap2             |                      |                                 | Brdt                 |                      |                                 |
| Casp8                |                      |                                 | Brd2                 |                      |                                 |
| Casp3                |                      |                                 | Bpifc                |                      |                                 |
| Casc3                |                      |                                 | Bok                  |                      |                                 |
| Carm1                |                      |                                 | Bnc2                 |                      |                                 |
| Carhsp1              |                      |                                 | Bmpr1a               |                      |                                 |
| Car11                |                      |                                 | Bmf                  |                      |                                 |
| Capn2                |                      |                                 | Bloc1s1              |                      |                                 |
| Capg                 |                      |                                 | Birc3                |                      |                                 |
| Canx                 |                      |                                 | Bin1                 |                      |                                 |
| Cand1                |                      |                                 | Bicd2                |                      |                                 |
| Camta1               |                      |                                 | Bicd1                |                      |                                 |
| Camsap3              |                      |                                 | Bhlha15              |                      |                                 |
| Camkk2               |                      |                                 | Bglap                |                      |                                 |
| Camkk1               |                      |                                 | Bcl6                 |                      |                                 |
| Camk4                |                      |                                 | Bcl2a1               |                      |                                 |
| Camk1g               |                      |                                 | Bccip                |                      |                                 |
| Calr3                |                      |                                 | Bcar3                |                      |                                 |
| Calr                 |                      |                                 | Bbs4                 |                      |                                 |
| Calml3               |                      |                                 | Baz1b                |                      |                                 |
| Calm2                |                      |                                 | Banp                 |                      |                                 |
| Calm1                |                      |                                 | Bambi                |                      |                                 |
| Calcr1               |                      |                                 | Bak1                 |                      |                                 |
| Cadm3                |                      |                                 | Baiap2l1             |                      |                                 |
| Cadm2                |                      |                                 | Baiap2               |                      |                                 |
| Cacybp               |                      |                                 | Bag6                 |                      |                                 |
| Cacng4               |                      |                                 | Bad                  |                      |                                 |
| Cacng2               |                      |                                 | Bace1                |                      |                                 |
| Cacng1               |                      |                                 | B9d1                 |                      |                                 |
| Cacnb4               |                      |                                 | B4galt7              |                      |                                 |
| Cacnb2               |                      |                                 | B3galnt2             |                      |                                 |
| Cabp1                |                      |                                 | Azin1                |                      |                                 |
| C1qtnf7              |                      |                                 | Azgp1                |                      |                                 |
| C1qtnf4              |                      |                                 | Aurkb                |                      |                                 |
| C1ql3                |                      |                                 | Auh                  |                      |                                 |
| Bves                 |                      |                                 | Atxn1                |                      |                                 |
| Bud13                |                      |                                 | Atraid               |                      |                                 |
| Btla                 |                      |                                 | Atp8b1               |                      |                                 |
| Btg1                 |                      |                                 | Atp6v1h              |                      |                                 |
| Btd                  |                      |                                 | Atp6v1b2             |                      |                                 |

| <u>Egr2-specific</u> | <u>Myrf-specific</u> | <u>Both</u><br><u>Egr2/Myrf</u> | <u>Egr2-specific</u> | <u>Myrf-specific</u> | <u>Both</u><br><u>Egr2/Myrf</u> |
|----------------------|----------------------|---------------------------------|----------------------|----------------------|---------------------------------|
| Atp6v0e2             |                      |                                 | Arhgef39             |                      |                                 |
| Atp6v0d1             |                      |                                 | Arhgef12             |                      |                                 |
| Atp6v0a1             |                      |                                 | Arhgdia              |                      |                                 |
| Atp5o                |                      |                                 | Arhgap39             |                      |                                 |
| Atp5g1               |                      |                                 | Arhgap31             |                      |                                 |
| Atp5a1               |                      |                                 | Arhgap26             |                      |                                 |
| Atp2c1               |                      |                                 | Arhgap12             |                      |                                 |
| Atp2a2               |                      |                                 | Arhgap10             |                      |                                 |
| Atp13a3              |                      |                                 | Arfgap2              |                      |                                 |
| Atp12a               |                      |                                 | Arf1                 |                      |                                 |
| Atp11a               |                      |                                 | Arc                  |                      |                                 |
| Atm                  |                      |                                 | Aqp2                 |                      |                                 |
| Atg7                 |                      |                                 | App                  |                      |                                 |
| Atg2a                |                      |                                 | Apobec2              |                      |                                 |
| Atg14                |                      |                                 | Aplnr                |                      |                                 |
| Atg12                |                      |                                 | Aplf                 |                      |                                 |
| Atf4                 |                      |                                 | Apip                 |                      |                                 |
| Atad3a               |                      |                                 | Aph1b                |                      |                                 |
| Asmtl                |                      |                                 | Apc                  |                      |                                 |
| Asgr2                |                      |                                 | Apbb1ip              |                      |                                 |
| Asgr1                |                      |                                 | Apaf1                |                      |                                 |
| Asf1a                |                      |                                 | Ap5z1                |                      |                                 |
| Ascc3                |                      |                                 | Ap3s1                |                      |                                 |
| Ascc1                |                      |                                 | Ap2b1                |                      |                                 |
| Asb12                |                      |                                 | Anxa8                |                      |                                 |
| Asah1                |                      |                                 | Anxa10               |                      |                                 |
| Arsi                 |                      |                                 | Ano4                 |                      |                                 |
| Arsg                 |                      |                                 | Anks1a               |                      |                                 |
| Arse                 |                      |                                 | Ankrd17              |                      |                                 |
| Arrb2                |                      |                                 | Ankrd13a             |                      |                                 |
| Arpp19               |                      |                                 | Ank3                 |                      |                                 |
| Arpc5                |                      |                                 | Angptl2              |                      |                                 |
| Arpc3                |                      |                                 | Andpro               |                      |                                 |
| Arpc1b               |                      |                                 | Anapc5               |                      |                                 |
| Armc8                |                      |                                 | Amz2                 |                      |                                 |
| Armc12               |                      |                                 | Amph                 |                      |                                 |
| Arl6ip6              |                      |                                 | Amotl2               |                      |                                 |
| Arl6ip4              |                      |                                 | Amdhd2               |                      |                                 |
| Arl4d                |                      |                                 | Amd1                 |                      |                                 |
| Arl2bp               |                      |                                 | Amacr                |                      |                                 |
| Arih1                |                      |                                 | Als2cr11             |                      |                                 |
| Arid5a               |                      |                                 | Als2                 |                      |                                 |
| Arid4b               |                      |                                 | Aloxe3               |                      |                                 |
| Arid3b               |                      |                                 | Alox5ap              |                      |                                 |
| Arhgef40             |                      |                                 | Alox5                |                      |                                 |

| <u>Egr2-specific</u> | <u>Myrf-specific</u> | <u>Both</u><br><u>Egr2/Myrf</u> | <u>Egr2-specific</u> | <u>Myrf-specific</u> | <u>Both</u><br><u>Egr2/Myrf</u> |
|----------------------|----------------------|---------------------------------|----------------------|----------------------|---------------------------------|
| Alkbh5               |                      |                                 | Actr1b               |                      |                                 |
| Alkbh2               |                      |                                 | Actg1                |                      |                                 |
| Aldh9a1              |                      |                                 | Acss2                |                      |                                 |
| Aldh1a2              |                      |                                 | Acsl3                |                      |                                 |
| Alcam                |                      |                                 | Acsl1                |                      |                                 |
| Aktip                |                      |                                 | Acpl2                |                      |                                 |
| Akr1c14              |                      |                                 | Acot13               |                      |                                 |
| Akr1c13              |                      |                                 | Acnat2               |                      |                                 |
| Akr1a1               |                      |                                 | Acly                 |                      |                                 |
| Akap7                |                      |                                 | Acin1                |                      |                                 |
| Akap2                |                      |                                 | Acbd5                |                      |                                 |
| Akap12               |                      |                                 | Acap2                |                      |                                 |
| Akap11               |                      |                                 | Acaca                |                      |                                 |
| Ajuba                |                      |                                 | Acaa2                |                      |                                 |
| Ahnak                |                      |                                 | Acaa1a               |                      |                                 |
| Afap1                |                      |                                 | Abtb1                |                      |                                 |
| Adtrp                |                      |                                 | Abt1                 |                      |                                 |
| Adss                 |                      |                                 | Ablim3               |                      |                                 |
| Adsl                 |                      |                                 | Abi1                 |                      |                                 |
| Adra1a               |                      |                                 | Abhd8                |                      |                                 |
| Adprm                |                      |                                 | Abhd5                |                      |                                 |
| Adprh                |                      |                                 | Abhd3                |                      |                                 |
| Adora2a              |                      |                                 | Abhd2                |                      |                                 |
| Adora1               |                      |                                 | Abhd16b              |                      |                                 |
| Ado                  |                      |                                 | Abhd13               |                      |                                 |
| Adh5                 |                      |                                 | Abcf3                |                      |                                 |
| Add1                 |                      |                                 | Abcd2                |                      |                                 |
| Adcy8                |                      |                                 | Abcc12               |                      |                                 |
| Adcy2                |                      |                                 | Abcc1                |                      |                                 |
| Adck2                |                      |                                 | Abcb9                |                      |                                 |
| Adap1                |                      |                                 | Abca5                |                      |                                 |
| Adamts9              |                      |                                 | Aanat                |                      |                                 |
| Adamts7              |                      |                                 | Aamdc                |                      |                                 |
| Adamts5              |                      |                                 | Aaed1                |                      |                                 |
| Adamts3              |                      |                                 | Aacs                 |                      |                                 |
| Adamts19             |                      |                                 | Aaas                 |                      |                                 |
| Adamts18             |                      |                                 |                      |                      |                                 |
| Adam2                |                      |                                 |                      |                      |                                 |
| Adam1a               |                      |                                 |                      |                      |                                 |
| Adam19               |                      |                                 |                      |                      |                                 |
| Adam17               |                      |                                 |                      |                      |                                 |
| Acy1                 |                      |                                 |                      |                      |                                 |
| Actrt2               |                      |                                 |                      |                      |                                 |
| Actr3                |                      |                                 |                      |                      |                                 |
| Actr2                |                      |                                 |                      |                      |                                 |

Supplementary Table 2 Gene ontology (GO) terms clustering and Kegg pathway analysis on Egr2/Myrf shared target genes.

| <b>Supplementary Figure 2</b>                     |                                                                  |       |            |            |               |            |          |           |              |            |            |            |
|---------------------------------------------------|------------------------------------------------------------------|-------|------------|------------|---------------|------------|----------|-----------|--------------|------------|------------|------------|
| <b>Top 5 Kegg pathways</b>                        |                                                                  |       |            |            |               |            |          |           |              |            |            |            |
| Category                                          | Term                                                             | Count | %          | PValue     | Genes         | List Total | Pop Hits | Pop Total | Fold Enrichm | Bonferroni | Benjamini  | FDR        |
| GOTERM_BP                                         | GO:0007242~intracellular signaling cascade                       | 30    | 11.4942529 | 3.80E-05   | RAB5B, STK1   | 172        | 925      | 12092     | 2.28007542   | 0.05825737 | 0.05825737 | 0.06356805 |
| GOTERM_CC                                         | GO:0042995~cell projection                                       | 25    | 9.57854406 | 5.00E-05   | ACTB, CPLX2   | 149        | 727      | 10776     | 2.48700645   | 0.0125131  | 0.0125131  | 0.06497406 |
| SP_PIR_KEYV                                       | phosphoprotein                                                   | 77    | 29.5019157 | 1.43E-04   | SEPT3, NRP1,  | 159        | 3047     | 8979      | 1.42708262   | 0.03369907 | 0.03369907 | 0.18483981 |
| KEGG_PATHV                                        | mo04062:Chemokine signaling pathway                              | 10    | 3.83141762 | 8.17E-04   | GNB2, ROCK    | 83         | 171      | 5590      | 3.93856126   | 0.07996737 | 0.07996737 | 0.90619871 |
| GOTERM_CC                                         | GO:0043005~neuron projection                                     | 16    | 6.1302682  | 9.51E-04   | ACTB, P2RX4   | 149        | 436      | 10776     | 2.65402377   | 0.21321749 | 0.11299238 | 1.23014142 |
| <b>Top 5 groups from GO analysis</b>              |                                                                  |       |            |            |               |            |          |           |              |            |            |            |
| Annotation C Enrichment Score: 2.1844614741973567 |                                                                  |       |            |            |               |            |          |           |              |            |            |            |
| Category                                          | Term                                                             | Count | %          | PValue     | Genes         | List Total | Pop Hits | Pop Total | Fold Enrichm | Bonferroni | Benjamini  | FDR        |
| SP_PIR_KEYV                                       | sh3 domain                                                       | 8     | 3.0651341  | 0.00390394 | CTTN, NCF1,   | 159        | 114      | 8979      | 3.96292618   | 0.60736254 | 0.26774236 | 4.92036221 |
| INTERPRO                                          | IPR001452:Src homology-3 domain                                  | 8     | 3.0651341  | 0.0049586  | CTTN, NCF1,   | 167        | 129      | 10240     | 3.8026273    | 0.86171403 | 0.62813178 | 6.69386215 |
| SMART                                             | SM00326:SH3                                                      | 8     | 3.0651341  | 0.01444618 | CTTN, NCF1,   | 103        | 129      | 5083      | 3.06043501   | 0.76663565 | 0.516922   | 14.914421  |
| Annotation C Enrichment Score: 1.775356190620437  |                                                                  |       |            |            |               |            |          |           |              |            |            |            |
| Category                                          | Term                                                             | Count | %          | PValue     | Genes         | List Total | Pop Hits | Pop Total | Fold Enrichm | Bonferroni | Benjamini  | FDR        |
| GOTERM_BP                                         | GO:0042981~regulation of apoptosis                               | 18    | 6.89655172 | 0.01531652 | NACC1, PTPR   | 172        | 677      | 12092     | 1.86919034   | 1          | 0.70412656 | 22.742865  |
| GOTERM_BP                                         | GO:0043067~regulation of programmed cell death                   | 18    | 6.89655172 | 0.0172206  | NACC1, PTPR   | 172        | 686      | 12092     | 1.84466744   | 1          | 0.69631797 | 25.2026954 |
| GOTERM_BP                                         | GO:0010941~regulation of cell death                              | 18    | 6.89655172 | 0.01789465 | NACC1, PTPR   | 172        | 689      | 12092     | 1.8366355    | 1          | 0.69493417 | 26.0556923 |
| Annotation C Enrichment Score: 1.5286986183829283 |                                                                  |       |            |            |               |            |          |           |              |            |            |            |
| Category                                          | Term                                                             | Count | %          | PValue     | Genes         | List Total | Pop Hits | Pop Total | Fold Enrichm | Bonferroni | Benjamini  | FDR        |
| GOTERM_BP                                         | GO:0007409~axonogenesis                                          | 8     | 3.0651341  | 0.0165401  | ACTB, KLF7, F | 172        | 186      | 12092     | 3.02375594   | 1          | 0.69768836 | 24.3321539 |
| GOTERM_BP                                         | GO:0048667~cell morphogenesis involved in neuron differentiation | 8     | 3.0651341  | 0.02776111 | ACTB, KLF7, F | 172        | 207      | 12092     | 2.71699809   | 1          | 0.68936004 | 37.5405405 |
| GOTERM_BP                                         | GO:0000904~cell morphogenesis involved in differentiation        | 8     | 3.0651341  | 0.05648451 | ACTB, KLF7, F | 172        | 242      | 12092     | 2.32404382   | 1          | 0.7509581  | 62.1667406 |
| Annotation C Enrichment Score: 1.5210706418989368 |                                                                  |       |            |            |               |            |          |           |              |            |            |            |
| Category                                          | Term                                                             | Count | %          | PValue     | Genes         | List Total | Pop Hits | Pop Total | Fold Enrichm | Bonferroni | Benjamini  | FDR        |
| GOTERM_BP                                         | GO:0045671~negative regulation of osteoclast differentiation     | 3     | 1.14942529 | 0.00670533 | TNFRSF11B, T  | 172        | 9        | 12092     | 23.4341085   | 0.9999755  | 0.73474933 | 10.6377647 |
| GOTERM_BP                                         | GO:0002762~negative regulation of myeloid leukocyte differentiat | 3     | 1.14942529 | 0.01618209 | TNFRSF11B, T  | 172        | 14       | 12092     | 15.0647841   | 1          | 0.70651087 | 23.8703616 |
| GOTERM_BP                                         | GO:0045638~negative regulation of myeloid cell differentiation   | 3     | 1.14942529 | 0.04477186 | TNFRSF11B, T  | 172        | 24       | 12092     | 8.7877907    | 1          | 0.72492775 | 53.5007532 |
| GOTERM_BP                                         | GO:0045670~regulation of osteoclast differentiation              | 3     | 1.14942529 | 0.04477186 | TNFRSF11B, T  | 172        | 24       | 12092     | 8.7877907    | 1          | 0.72492775 | 53.5007532 |
| GOTERM_BP                                         | GO:0002761~regulation of myeloid leukocyte differentiation       | 3     | 1.14942529 | 0.11407275 | TNFRSF11B, T  | 172        | 41       | 12092     | 5.1440726    | 1          | 0.80476927 | 86.7979586 |
| Annotation C Enrichment Score: 1.5145134818598016 |                                                                  |       |            |            |               |            |          |           |              |            |            |            |
| Category                                          | Term                                                             | Count | %          | PValue     | Genes         | List Total | Pop Hits | Pop Total | Fold Enrichm | Bonferroni | Benjamini  | FDR        |
| GOTERM_BP                                         | GO:0048812~neuron projection morphogenesis                       | 9     | 3.44827586 | 0.01138426 | ACTB, KLF7, F | 172        | 215      | 12092     | 2.94288805   | 0.99999999 | 0.75087488 | 17.4201849 |
| GOTERM_BP                                         | GO:0048858~cell projection morphogenesis                         | 9     | 3.44827586 | 0.01986177 | ACTB, KLF7, F | 172        | 238      | 12092     | 2.6584913    | 1          | 0.71812517 | 28.4930471 |
| GOTERM_BP                                         | GO:0032990~cell part morphogenesis                               | 9     | 3.44827586 | 0.02468372 | ACTB, KLF7, F | 172        | 248      | 12092     | 2.55129407   | 1          | 0.69733919 | 34.1520405 |
| GOTERM_BP                                         | GO:0031175~neuron projection development                         | 9     | 3.44827586 | 0.04019752 | ACTB, KLF7, F | 172        | 273      | 12092     | 2.31765909   | 1          | 0.71206916 | 49.6348526 |
| GOTERM_BP                                         | GO:0048666~neuron development                                    | 9     | 3.44827586 | 0.11926141 | ACTB, KLF7, F | 172        | 347      | 12092     | 1.82340326   | 1          | 0.80132926 | 88.0327361 |

Supplementary Table 3 Shared Egr2/Myrf target genes that are Egr2-dependent.

| <u>direction</u> | <u>Fold</u><br><u>change</u> | <u>logFC</u> | <u>Gene</u> | <u>direction</u> | <u>Fold</u><br><u>change</u> | <u>logFC</u>  | <u>Gene</u>   |
|------------------|------------------------------|--------------|-------------|------------------|------------------------------|---------------|---------------|
| up               | 2.755                        | 1.462        | Ctnn        | down             | 0.696                        | -0.524        | Cdk2ap1       |
| up               | 2.300                        | 1.202        | Map4k4      | down             | 0.694                        | -0.528        | Mag           |
| up               | 2.065                        | 1.046        | Ncl         | down             | 0.691                        | -0.533        | Ndfip2        |
| up               | 1.926                        | 0.946        | P2rx4       | down             | 0.688                        | -0.540        | Klf9          |
| up               | 1.817                        | 0.861        | Ctnn        | down             | 0.686                        | -0.543        | Scarb1        |
| up               | 1.782                        | 0.834        | Morf4l2     | down             | 0.673                        | -0.572        | Nfix          |
| up               | 1.759                        | 0.814        | Cnot6       | down             | 0.669                        | -0.581        | Mbp           |
| up               | 1.692                        | 0.758        | Ss18        | down             | 0.667                        | -0.584        | Gsn           |
| up               | 1.685                        | 0.753        | Fem1b       | down             | 0.660                        | -0.599        | Ahi1          |
| up               | 1.676                        | 0.745        | Stard13     | down             | 0.634                        | -0.657        | Syt11         |
| up               | 1.676                        | 0.745        | Ctnn        | down             | 0.633                        | -0.659        | Gsn           |
| up               | 1.666                        | 0.736        | Syncrip     | down             | 0.630                        | -0.668        | Mbp           |
| up               | 1.640                        | 0.714        | Gnb2        | down             | 0.627                        | -0.673        | Nfix          |
| up               | 1.636                        | 0.710        | Sppl2b      | down             | 0.618                        | -0.695        | Rpia          |
| up               | 1.609                        | 0.687        | Morf4l2     | down             | 0.614                        | -0.703        | Pim3          |
| up               | 1.567                        | 0.648        | P2rx4       | down             | 0.612                        | -0.709        | Klf9          |
| up               | 1.483                        | 0.569        | Sox10       | down             | 0.610                        | -0.713        | Nek9          |
| up               | 1.472                        | 0.558        | Ubl3        | down             | 0.608                        | -0.717        | Cd82          |
| up               | 1.462                        | 0.548        | Ninj1       | down             | 0.607                        | -0.721        | Gsn           |
| up               | 1.432                        | 0.518        | Sec11c      | down             | 0.575                        | -0.799        | Fam129b       |
| up               | 1.426                        | 0.512        | Ict1        | down             | 0.570                        | -0.812        | Cyp7b1        |
| up               | 1.342                        | 0.425        | Ddx1        | down             | 0.560                        | -0.835        | Thra          |
| up               | 1.303                        | 0.382        | Actb        | down             | 0.557                        | -0.844        | Nfix          |
| up               | 1.294                        | 0.372        | Psmb4       | down             | 0.543                        | -0.881        | Klf9          |
| up               | 1.290                        | 0.368        | Wdr5        | down             | 0.542                        | -0.884        | Syt11         |
| up               | 1.289                        | 0.366        | Foxo3       | down             | 0.533                        | -0.907        | Nfic          |
| up               | 1.283                        | 0.360        | Myo18a      | down             | 0.527                        | -0.925        | Gpd1          |
| up               | 1.265                        | 0.340        | Stx8        | down             | 0.515                        | -0.958        | Limch1        |
| up               | 1.261                        | 0.334        | Cnot6       | down             | 0.504                        | -0.989        | Gsn           |
| down             | 0.799                        | -0.323       | Adam15      | down             | 0.504                        | -0.990        | Pink1         |
| down             | 0.782                        | -0.355       | St3gal3     | down             | 0.489                        | -1.033        | Psmf1         |
| down             | 0.781                        | -0.356       | Cyp7b1      | down             | 0.472                        | -1.083        | Ptprf         |
| down             | 0.775                        | -0.367       | Uqcr10      | down             | 0.472                        | -1.083        | Ptprf         |
| down             | 0.775                        | -0.368       | Ptprf       | down             | 0.455                        | -1.137        | Cmtm6         |
| down             | 0.763                        | -0.390       | Limd1       | down             | 0.439                        | -1.188        | Gpd1          |
| down             | 0.756                        | -0.403       | Clic4       | down             | 0.428                        | -1.225        | Mbp           |
| down             | 0.737                        | -0.440       | Vamp3       | down             | 0.427                        | -1.226        | Cmtm6         |
| down             | 0.719                        | -0.475       | Ptpn11      | down             | 0.423                        | -1.242        | Limch1        |
| down             | 0.718                        | -0.477       | Abca2       | down             | 0.418                        | -1.258        | Olfml2b       |
| down             | 0.715                        | -0.485       | Klf9        | down             | 0.403                        | -1.312        | Tmcc3         |
| down             | 0.713                        | -0.488       | Kcna1       | down             | 0.403                        | -1.312        | Tmcc3         |
| down             | 0.698                        | -0.520       | Lgals8      | down             | 0.396                        | -1.338        | Pik3r1        |
| down             | 0.697                        | -0.520       | Zfyve21     | down             | 0.389                        | -1.361        | Mprip         |
|                  |                              |              |             | down             | 0.374                        | -1.420        | Mbp           |
|                  |                              |              |             | down             | 0.342                        | -1.550        | St6gal1       |
|                  |                              |              |             | <b>down</b>      | <b>0.322</b>                 | <b>-1.635</b> | <b>Dusp15</b> |
|                  |                              |              |             | down             | 0.322                        | -1.637        | Mbp           |



| <u>direction</u> | <u>Fold</u><br><u>change</u> | <u>logFC</u> | <u>Gene</u> |
|------------------|------------------------------|--------------|-------------|
| down             | 0.292                        | -1.777       | Tmem189     |
| down             | 0.263                        | -1.925       | Mbp         |
| down             | 0.248                        | -2.012       | Fa2h        |
| down             | 0.226                        | -2.146       | Mbp         |
| down             | 0.219                        | -2.194       | St6gal1     |
| down             | 0.207                        | -2.273       | Fgf1        |
| down             | 0.138                        | -2.855       | Fgf1        |
